1 **Poly(ADP-ribose) glycohydrolase promotes formation and homology-directed repair of**  
2 **meiotic DNA double-strand breaks independent of its catalytic activity**

3  
4 Eva Janisiw<sup>1,6</sup>, Marilina Raices<sup>2</sup>, Fabiola Balmir<sup>2,7</sup>, Luis Paulin Paz<sup>3</sup>, Antoine Baudrimont<sup>1</sup>,  
5 Arndt von Haeseler<sup>3,4</sup>, Judith L. Yanowitz<sup>2</sup>, Verena Jantsch<sup>1</sup> and Nicola Silva<sup>5,\*</sup>

6  
7 <sup>1</sup>Department of Chromosome Biology, Max Perutz Laboratories, Vienna Biocenter, University  
8 of Vienna, Vienna (Austria).

9 <sup>2</sup>Magee-Womens Research Institute, Department of Obstetrics, Gynecology, and  
10 Reproductive Sciences, University of Pittsburgh School of Medicine, Pittsburgh, PA (USA).

11 <sup>3</sup>Center for Integrative Bioinformatics Vienna (CIBIV), Max F. Perutz Laboratories, University  
12 of Vienna and Medical University of Vienna, Vienna BioCenter (VBC), Vienna, (Austria).

13 <sup>4</sup>Bioinformatics and Computational Biology, Faculty of Computer Science, University of  
14 Vienna, Vienna (Austria)

15 <sup>5</sup>Department of Biology, Faculty of Medicine, Masaryk University, Brno (Czech Republic).

16 <sup>6</sup>Current address: Centre for Anatomy and Cell Biology, Medical University of Vienna, Vienna  
17 (Austria).

18 <sup>7</sup>Current address: AHN Center for Reproductive Medicine, AHN McCandless, Pittsburgh, PA  
19 (USA)

20  
21 \*Correspondence: [silva@med.muni.cz](mailto:silva@med.muni.cz)

22

23

24

25

## 26 **Summary**

27 Poly(ADP-ribosyl)ation is a reversible post-translational modification synthesized by ADP-  
28 ribose transferases and removed by poly(ADP-ribose) glycohydrolase (PARG), which plays  
29 important roles in DNA damage repair. While well-studied in somatic tissues, much less is  
30 known about poly(ADP-ribosyl)ation in the germline, where DNA double-strand breaks are  
31 introduced by a regulated program and repaired by crossover recombination to establish a  
32 tether between homologous chromosomes. The interaction between the parental  
33 chromosomes is facilitated by meiotic specific adaptation of the chromosome axes and  
34 cohesins, and reinforced by the synaptonemal complex. Here, we uncover an unexpected  
35 role for PARG in promoting the induction of meiotic DNA breaks and their homologous  
36 recombination-mediated repair in *Caenorhabditis elegans*. PARG-1/PARG interacts with both  
37 axial and central elements of the synaptonemal complex, REC-8/Rec8 and the MRN/X  
38 complex. PARG-1 shapes the recombination landscape and reinforces the tightly regulated  
39 control of crossover numbers without requiring its catalytic activity. We unravel roles in  
40 regulating meiosis, beyond its enzymatic activity in poly(ADP-ribose) catabolism.

41

42

43

44

45

46

47

48

49

50 **Key words:** Meiosis, meiotic DNA repair, PARylation, PARG, *C. elegans* germ line

## 51 **Introduction**

52 Poly(ADP-ribosyl)ation (PARylation) is an essential post-translational modification involved in  
53 chromatin dynamics, transcriptional regulation, apoptosis, and DNA repair (Koh et al., 2004;  
54 Menissier de Murcia et al., 2003). PARylation is controlled by the opposing activities of PAR  
55 polymerases, PARP1 and PARP2 (PARPs), and PAR glycohydrolase (PARG) (O'Sullivan et  
56 al., 2019; Slade, 2019). The activities of PARPs are crucial for an efficient DNA damage  
57 response, as loss of PARP1 or PARP2 leads to hypersensitivity to genotoxic stress and  
58 impaired spermatogenesis, while the combined deficiencies of PARP1 and PARP2 cause  
59 embryonic lethality (Dantzer et al., 2006; Menissier de Murcia et al., 2003). Likewise, the  
60 PARG knock-out is embryonic lethal and depleted cells become sensitive to ionizing radiation  
61 (IR) and show aberrant mitotic progression (Ame et al., 2009; Koh et al., 2004).

62 Since PARP1/2 double mutants or PARG knock-outs are embryonic lethal in mouse and no  
63 orthologs are present in yeast, our understanding of the roles of PARylation during germ line  
64 development has been limited. *C. elegans* *parg-1/PARG* null mutants are viable and fertile  
65 (Byrne et al., 2016; St-Laurent et al., 2007), allowing us to analyze their function(s) during  
66 gametogenesis. It has been previously shown that *parp-1/-2* and *parg-1* mutants display  
67 hypersensitivity to IR exposure (Dequen et al., 2005; Gagnon et al., 2002; St-Laurent et al.,  
68 2007) however their roles during gametogenesis have remained poorly investigated.

69  
70 In sexually reproducing species, preservation of ploidy across generations relies on meiosis,  
71 a specialized cell division program which promotes the generation of haploid gametes  
72 (Zickler and Kleckner, 1999, 2015). The formation of crossovers (CO) is essential for faithful  
73 chromosome segregation into the gametes (Cao et al., 1990; Sun et al., 1989). Connected  
74 parental homologous chromosomes (also called bivalents) can cytologically be detected in  
75 diakinesis nuclei and are thus a readout for the success of the CO establishment. COs arise

76 by the generation and homologous recombination-mediated repair of programmed DNA  
77 double-strand breaks (DSB) effectuated by the evolutionarily conserved topoisomerase VI-  
78 like protein Spo11 (Keeney et al., 1997). The activity of Spo11 is tightly regulated to ensure  
79 the correct timing, placement, and number of DSBs/COs along meiotic chromosome axes.  
80 In *C. elegans*, several factors involved in promoting meiotic DSBs have been identified, and  
81 those include MRE-11, HIM-5, HIM-17, DSB-1, DSB-2 and XND-1 (Chin and Villeneuve,  
82 2001; Meneely et al., 2012; Reddy and Villeneuve, 2004; Rosu et al., 2013; Stamper et al.,  
83 2013; Wagner et al., 2010). Of these, XND-1 and HIM-17 are known to also influence  
84 germline chromatin structure (Reddy and Villeneuve, 2004; Wagner et al., 2010). DSB-1 and  
85 DSB-2 appear to have roles in maintaining DSB competency throughout early pachytene  
86 (Rosu et al., 2013; Stamper et al., 2013). MRE-11 functions both in DSB formation and  
87 immediately downstream in end resection (Chin and Villeneuve, 2001); HIM-5 and DSB-2  
88 have also recently been shown to couple DSB formation with HR-mediate repair (Macaisne  
89 et al., 2018).

90  
91 The distribution and number of DSBs and COs also undergoes multiple levels of regulation.  
92 In all organisms studied, the number of DSBs exceeds the number of COs, with ratios  
93 reaching 10:1 in some cases (Serrentino and Borde, 2012). The excess DSBs use HR-like  
94 mechanisms to be repaired with high fidelity, with repair intermediates shunted into non-CO  
95 (NCO) outcomes. Importantly, a robust inter-homolog repair bias ensures formation of the  
96 obligate CO in the germ cells, which in *C. elegans* occurs even under subthreshold levels of  
97 DSBs (Meneely et al., 2012; Rosu et al., 2011; Yokoo et al., 2012). CO interference (Youds  
98 et al., 2010; Zickler and Kleckner, 1999) describes the phenomenon whereby CO-committed  
99 intermediates influence nearby DSBs to be repaired as NCOs, ensuring that COs are well-  
100 spaced across the genome. In *C. elegans*, CO interference is nearly complete, as each



101 chromosome pair receives, in most cases, only one CO (Hillers and Villeneuve, 2003). On  
102 the autosomes of the worm, COs occur preferentially on the arms of the chromosomes, away  
103 from the gene-rich region in the center of the chromosomes; on the heterochromatic-like X  
104 chromosome, there is not gene cluster and COs are more evenly dispersed (Barnes et al.,  
105 1995).

106  
107 While CO interference explains much about CO distribution in most organisms, some COs  
108 are known to arise from an interference-independent pathway. The COs generated through  
109 interference-dependent (Class I) and interference-independent mechanisms (Class II) have  
110 distinct genetic requirement, driven by MutS-MutL and Mus81 homologs respectively (de los  
111 Santos et al., 2003). Genetic evidence suggests that, in *C. elegans*, only Class I COs are  
112 present (Kelly et al., 2000; Zalevsky et al., 1999). Nevertheless mutants displaying  
113 interference-insensitive COs have been reported (Tsai et al., 2008; Youds et al., 2010),  
114 however, these are still dependent on the canonical MSH-5/COSA-1-mediated CO pathway  
115 and they can be detected by genetic measurements of recombination (Yokoo et al., 2012).

116  
117 CO-repair takes place in the context of the synaptonemal complex (SC), a tripartite  
118 proteinaceous structure composed of axial and central elements, arranged as a protein-  
119 zipper between each pair of homologs. The SC maintains homolog associations and  
120 facilitates inter-homolog exchange of DNA during repair (Colaiacovo et al., 2003). Cross-talk  
121 between the SC and COs is essential for modulating recombination. Incomplete synapsis  
122 dramatically weakens CO interference and additional COs *per* chromosome can be observed  
123 (Libuda et al., 2013; Rosu et al., 2011). Conversely, reduced, but not absent, recombination  
124 levels causes premature desynapsis of the chromosome pairs that fail to establish a CO  
125 (Machovina et al., 2016; Pattabiraman et al., 2017; Wagner et al., 2010).

126 Chromosome axis components, which in *C. elegans* include the HORMA-domain proteins  
127 HTP-3, HTP-1/2, and HIM-3 (Goodyer et al., 2008; Martinez-Perez and Villeneuve, 2005;  
128 Zetka et al., 1999), influence both the abundance of DSBs and the regulation of their repair.

129

130 In this study, we show an unexpected involvement of PARG-1 in promoting DSB and CO  
131 formation. We show that PARG-1 functions independently of the known DSB initiation factors  
132 and that it cooperates with HIM-5 to regulate global crossover numbers. PARG-1 is detected  
133 throughout the germ line and undergoes a progressive recruitment along synapsed  
134 chromosomes, culminating in the retraction to the short arm of the bivalent and enrichment at  
135 the putative CO sites. In the absence of PARG-1 function, we observe an accumulation of  
136 PAR on the meiotic chromosomes, which is suppressed by abrogation of PARP-2 function.  
137 We report the association of PARG-1 with numerous key proteins composing the meiosis-  
138 specific structure of the SC both by cytological and biochemical analysis. Surprisingly, we  
139 found that PARG-1 loading, rather than its catalytic activity, is essential to exert its function  
140 during meiosis. Our data strongly suggest that PARG has scaffolding properties which are  
141 important for the fine-tuning of meiotic recombination events.

142

## 143 **Results**

### 144 **PARG-1 is the main poly(ADP-ribose) glycohydrolase in the *C. elegans* germ line**

145 The *C. elegans* genome encodes two orthologs of mammalian PARG, PARG-1 and PARG-2  
146 (Bae et al., 2019; Byrne et al., 2016; St-Laurent et al., 2007). Both mutants are  
147 hypersensitive to IR exposure and more recently it was shown that *parg-2* is involved in the  
148 regulation of HR-dependent repair of ectopic DSBs by influencing the extent of resection  
149 upon IR (Bae et al., 2019). To explore possible functional links or redundancies between  
150 *parg-1* and *parg-2*, we used CRISPR to engineer *parg-2* null mutations in both the wild type

151 (WT) and *parg-1(gk120)* deletion mutant backgrounds (Fig.1A). In contrast to mammalian  
152 PARG, *C. elegans parg-1* and *parg-2* are largely dispensable for viability (Fig. 1B). However,  
153 abrogation of *parg-1*, but not *parg-2* function, led to increased levels of embryonic lethality  
154 and segregation of males (which arise from X chromosome nondisjunction (Hodgkin et al.,  
155 1979). Screening of *parg-1 parg-2* double mutants did not reveal synthetic phenotypes but  
156 recapitulated the *parg-1* phenotypic features, indicating that *parg-2* does not exert prominent  
157 roles in an otherwise wild type background and cannot compensate the lack of *parg-1*  
158 function (fig. 1B).

159  
160 To confirm a role of PARG-1 and PARG-2 in PAR catabolism, we investigated PAR  
161 accumulation in the mutant animals. Because PAR undergoes a rapid turnover, PAR cannot  
162 be detected in wild-type germ lines (Fig. 1C). By contrast, we detected PAR at all stages of  
163 meiotic prophase I in *parg-1* mutants. Since PAR accumulation was neither seen in *parg-2*  
164 mutants nor further enhanced in *parg-1 parg-2* (Fig.1C), we infer that PARG-1 is the major  
165 PAR glyohydrolase in the worm germ line.

166  
167 Removal of the PAR polymerases *parp-1/-2*, suppressed accumulation of PAR in *parg-1*  
168 mutant germ cells (Fig. 1D). Interestingly, we found that while abrogation of *parp-1* function  
169 reduced detectable levels to roughly 30%, lack of *parp-2* alone was sufficient to bring PAR  
170 staining to background levels. Since both *parp-1(ddr31)* and *parp-2(ok344)* mutant alleles are  
171 null, this data suggests that PARP-2 is mainly responsible for the synthesis of PAR during *C.*  
172 *elegans* meiotic prophase I.

173  
174 Since PAR accumulates at sites of DNA damage in somatic cells (Kaufmann et al., 2017;  
175 Mortusewicz et al., 2011), we asked whether the accumulation of PAR in meiotic prophase

176 nuclei was dependent on the formation of meiotic DSBs. Surprisingly, we found that in the  
177 gonads of *parg-1 spo-11* double mutants, in which no programmed DSBs are made, PAR still  
178 localized within prophase I nuclei (Fig. S1), indicating that PAR synthesis occurs  
179 independently of physiological DNA damage during gametogenesis.

180

## 181 **PARG-1 forms protein complexes with SC components and its localization requires** 182 **chromosome axes**

183 To detect PARG-1, we raised a *C. elegans*-specific anti-PARG-1 monoclonal antibody which  
184 we used in western blot analysis (Fig. 2A). This antibody confirmed that *parg-1(gk120)* is a  
185 null allele. We find expression of PARG-1 in all subcellular compartments in wild-type  
186 animals (Fig. 2A), as similarly observed in mammalian mitotic cells (Meyer-Ficca et al., 2004;  
187 Ohashi et al., 2003; Winstall et al., 1999). Since localization of PARG is not known in  
188 meiocytes, we employed CRISPR to tag the 3' end of the endogenous *parg-1* locus with a  
189 GFP-tag. We assessed the functionality of the fusion protein by monitoring PAR  
190 accumulation in the gonad, embryonic lethality, and male progeny, none of which showed  
191 any differences compared to WT, indicating that PARG-1::GFP is catalytically active and fully  
192 functional (Fig. 1B-C and S1). Moreover, western blot analysis employing either anti-PARG-1  
193 or anti-GFP antibodies on fractionated extracts from *parg-1::GFP* worms revealed identical  
194 expression as seen with untagged PARG-1 (Fig. 2B), further confirming that the GFP-tag did  
195 not affect PARG-1 stability or expression.

196

197 Immunofluorescence analyses showed that PARG-1::GFP is first detected in pre-meiotic and  
198 leptotene/zygotene nuclei and then became progressively enriched along chromosomes  
199 throughout pachytene (Fig. 2C). Co-staining with axial proteins HTP-1/HTP-3 and the central  
200 SC component SYP-1 (Goodyer et al., 2008; MacQueen et al., 2002; Martinez-Perez and

201 Villeneuve, 2005) revealed recruitment of PARG-1::GFP onto synapsed chromosomes and  
202 its retraction in late pachytene cells to the short arm of the bivalent (Fig. 2D), a chromosomal  
203 subdomain formed in response to CO formation. The short arm of the bivalent harbors the  
204 chiasma and the central elements of the SC (de Carvalho et al., 2008; Martinez-Perez et al.,  
205 2008). Overlapping localization of PARG-1::GFP with both the CO promoting factor COSA-1  
206 and SYP-1 (Fig. 2E) confirmed recruitment of PARG-1 to this chromosomal subdomain,  
207 similar to other SC central elements components (Bhalla et al., 2008; Janisiw et al., 2018;  
208 Jantsch et al., 2004; Li et al., 2018; MacQueen et al., 2002). In CO-defective *cosa-1* mutant  
209 animals, we observed that the initial loading of PARG-1::GFP to the SC was unaffected, but  
210 no retraction was observed, confirming that the relocalization of PARG-1 is dependent on  
211 bivalent formation (Fig. 2F).

212  
213 Based on its localization to the SC, we tested whether PARG-1::GFP loading was dependent  
214 on chromosome axis or synapsis establishment. Loss of *htp-3*, encoding a HORMA domain-  
215 containing protein essential for axis morphogenesis (Goodyer et al., 2008), disrupted PARG-  
216 1::GFP localization, resulting in nucleoplasmic accumulation and occasional association with  
217 SYP-1-containing polycomplexes (Fig. 2G). By contrast, PARG-1::GFP exhibited linear  
218 staining along the chromosome axes in synapsis-deficient *syp-2* mutants (Fig. 2H), where  
219 only axial elements are loaded onto the chromosomes (Colaiacovo et al., 2003; Goodyer et  
220 al., 2008; Martinez-Perez and Villeneuve, 2005). Thus, we conclude that PARG-1 is recruited  
221 to the SC in an HTP-3-dependent manner and its localization changes in response to CO-  
222 mediated chromosome remodeling.

223  
224 Since PARG-1 localizes to chromosome axes and requires HTP-3 for loading, we wondered  
225 whether these factors formed protein complexes *in vivo*. To test for their possible association,

226 we performed immunoprecipitation assays by pulling down HTP-3::GFP (Paix et al., 2015)  
227 and proceeded with western blot analysis to detect PARG-1. Robust interaction between  
228 HTP-3::GFP and PARG-1 was observed (Fig. 2I). Further, to assess whether PARG-1  
229 establishes physical interactions with additional chromosome axis components as well, we  
230 also performed co-immunoprecipitation experiments pulling down HTP-1::GFP and REC-  
231 8::GFP, (Crawley et al., 2016; Silva et al., 2014). Western blot showed that PARG-1 co-  
232 immunoprecipitated with both HTP-1 and REC-8 (Fig. 2J). Extending these analysis to the  
233 central elements of the SC component, we found that PARG-1 could be pulled down with  
234 GFP::SYP-3 (Rog and Dernburg, 2015) (Fig. 2I). Together with our localization studies, these  
235 physical interactions indicate that PARG-1 is an intrinsic component of the SC.

236

### 237 **Loss of *parg-1* suppresses chromosome abnormalities arising from impaired DSB** 238 **resection**

239 Given PARG-1 recruitment along the SC and enrichment at the presumptive CO sites, we  
240 sought to investigate whether synapsis and CO formation are impaired in *parg-1* mutants.  
241 Using antibodies directed against HTP-3 and SYP-1 to monitor the establishment of the SC,  
242 we observed no difference between the wild type and *parg-1* mutants (Fig. S2A). DAPI-  
243 staining of diakinesis nuclei revealed the correct complement of six bodies as in wild-type  
244 worms (Fig. S2B). Thus, we infer that *parg-1* is dispensable for synapsis and CO formation.

245

246 We next addressed whether loss of *parg-1* would impact the formation and processing of  
247 recombination intermediates by analyzing the dynamic behaviour of the recombinase RAD-  
248 51, which forms discrete chromatin-associated foci with a distinct kinetics of appearance and  
249 disappearance (Alpi et al., 2003; Colaiacovo et al., 2003), (Fig. 3A-B). While in wild-type  
250 worms we see a progressive increase of RAD-51, peaking in early-mid pachytene (zone 3)

251 and disappearing by late pachytene (zone 6), in *parg-1* mutants, we observed the delayed  
252 formation of RAD-51 foci with progressive accumulation at the pachytene stage. RAD-51 foci  
253 formation was entirely suppressed by SPO-11 removal, suggesting specific abnormalities in  
254 the induction and/or processing of meiotic DSBs rather than spontaneous or unscheduled  
255 damage arising during mitotic replication (Fig. 3A-B).

256  
257 Since RAD-51 foci appeared with delayed kinetics, we wanted to investigate whether PARG-  
258 1 might have a role in the regulation of DSB formation. Since tools to directly quantify meiotic  
259 DSBs are presently not available in *C. elegans*, we took advantage of a genetic epistasis  
260 analysis to determine if *parg-1* has a role in DSB formation. In diakinesis nuclei, DSB  
261 resection-defective mutants, such as *com-1/CtIP/Sae2* and *mre-11(iow1)/Mre11*, display  
262 massive chromatin clumps and occasional chromosome fragments that arise from aberrant  
263 repair of meiotic DSBs. Accordingly, these clumps and fragments are fully suppressed in the  
264 DSB-devoid *spo-11* mutants (Chin and Villeneuve, 2001; Penkner et al., 2007; Yin and  
265 Smolikove, 2013). Similarly, in the *com-1; parg-1* and *parg-1; mre-11(iow1)* double mutants,  
266 we found that the vast majority of diakinesis nuclei contained twelve intact univalents (Fig.  
267 3C-D). These results are consistent with a role for PARG-1 in DSB induction, but could also  
268 reflect a function for *parg-1* in targeting breaks to alternative repair pathways.

269  
270 To distinguish between these possibilities, we exposed the aforementioned double mutants  
271 to gamma irradiation (IR) to ectopically induce DSBs. We reasoned that if *parg-1* mutants  
272 were defective solely in DSB induction, the breaks induced by IR should restore the aberrant  
273 chromosome morphology typical of *com-1* and *mre-11*. By contrast, if *parg-1* has a role in  
274 repair pathway utilization, the IR-induced breaks would still be shunted into an alternative  
275 pathway and the appearance of DAPI bodies would remain unchanged after IR exposure.



276 Diakinesis nuclei of irradiated *com-1*; *parg-1* reverted to the *com-1*-like (chromosome  
277 clumping-fusion) phenotype, supporting a putative role for PARG-1 in DSB induction. By  
278 contrast, *parg-1*; *mre-11(iow1)* were indistinguishable from non-irradiated controls, indicating  
279 that PARG-1 may also influence DNA repair pathway choice when *mre-11*, but not *com-1*,  
280 function is compromised (Fig. 3C-D). Together, these results suggest an involvement of  
281 PARG-1 in promoting both the formation and repair of meiotic DSBs.

282

### 283 **PARG-1 augments the formation of meiotic DSBs and interacts with MRE-11**

284 To further explore PARG-1's putative involvement in promoting DSBs, we tested its ability to  
285 genetically interact with mutations that are impaired in DSB induction. We combined the  
286 *parg-1(gk120)* deletion with two hypomorphic *him-17* alleles and with a *him-5* null mutation  
287 that reduce, but do not completely eliminate, SPO-11-dependent DNA breaks (Meneely et al.,  
288 2012; Reddy and Villeneuve, 2004). Consistent with published results, we observed that  
289 these single mutants displayed reduced numbers and delayed formation of RAD-51 foci  
290 (Meneely et al., 2012; Reddy and Villeneuve, 2004). The number of RAD-51 foci was further  
291 diminished in-both *parg-1*; *him-5* and *parg-1*; *him-17* double mutants (Fig. S3A). The defects  
292 in RAD-51 filament formation in *parg-1*; *him-17* and *parg-1*; *him-5* double mutants were  
293 correlated with defective loading of pro-CO factors such as HA::RMH-1, GFP::MSH-5 and  
294 OLLAS::COSA-1 (Fig. 4B-C and S4) as we would expect for mutations that impair DSB  
295 formation. Analysis of diakinesis nuclei revealed an extensive lack of chiasmata (Fig 4D) and  
296 enhancing embryonic lethality (Fig S3B) in the double mutants as expected from the defects  
297 in CO repair. Loading of RMH-1, MSH-5 and COSA-1, as well as bivalent formation, were  
298 largely, although not completely, rescued by IR exposure (Fig. 4A-D and S4), further  
299 corroborating that the lack of COs was due to impaired DSB formation. Abrogation of PARG-  
300 1 function also exacerbated the CO defect observed in both young (day #1) and old (day #2)



301 *dsb-2* mutants (Fig. S3C), which display an age-dependent loss in the proficiency to induce  
302 DSBs (Rosu et al., 2013). These results indicate that loss of *parg-1* function impairs a  
303 parallel, *him-17-*, *him-5*, and *dsb-2*-independent pathway for DSB induction.

304

305 To further interrogate PARG-1 function in DSB formation, we next sought to investigate the  
306 interplay between PARG-1 and DSB-promoting factors. To this end, we assessed the  
307 localization of the pro-DSB factors HIM-5::3xHA, HIM-17::3xHA, DSB-2 and XND-1 in *parg-1*  
308 mutants. We observed no gross defects in localization compared to the controls (Fig. S5A-D),  
309 which suggests that PARG-1 is not required for the loading of these pro-DSB factors.

310 Conversely, PARG-1::GFP loading appeared normal in *him-5*, *dsb-2*, and *him-17* (null and  
311 hypomorph alleles) mutant backgrounds. The only difference compared to wild type is the  
312 lack of retraction of PARG-1::GFP to the short arm of the bivalent, which is a consequence of  
313 the lack of COs caused by these mutations (Fig. S5E) similar to *cosa-1* mutations (described  
314 above). Given the synergistic phenotypes observed in the double mutants and the lack of  
315 defects in the loading/expression of DSB-promoting proteins, we conclude that PARG-1  
316 supports formation of DSB *via* alternative pathway(s) to the known pro-DSB factors in *C.*  
317 *elegans*.

318

319 It has been previously shown that the axial component HTP-3 promotes the formation of  
320 meiotic DSBs in worms possibly through its interaction with the MRN/X complex factor MRE-  
321 11, known to be involved in DSB formation (Goodyer et al., 2008; Hayashi et al., 2007; Yin  
322 and Smolikove, 2013). Since we already showed an interaction between HTP-3::GFP and  
323 PARG-1 (Fig. 2I), we now wanted to address if this extended to an association with MRE-11.  
324 Western blot analysis for PARG-1 on GFP pull downs performed with the *mre-11::GFP*  
325 transgene (Reichman et al., 2018) also showed coimmunoprecipitation (Fig. 4E). This

326 suggests that the PARG-1-mediated activity in promoting meiotic DSBs may intersect the  
327 HTP-3-MRE-11 axis.

328

### 329 **PARG-1 and HIM-5 modulate crossover numbers**

330 While the loading of pro-CO factors was largely rescued in the irradiated *parg-1; him-5*  
331 double mutants, over half of the diakinesis nuclei still displayed univalents (Fig. 4D),  
332 indicating substantial, yet incomplete, restoration of chiasmata. The dose employed in our  
333 irradiation experiments (10 Gy) sufficed to fully elicit bivalent formation in *him-5, spo-11*,  
334 *parg-1 spo-11* and *spo-11; him-5* (Mateo et al., 2016), (Fig. 4D). Therefore, we conclude that  
335 additional CO execution steps are defective in *parg-1; him-5*. Importantly, this phenotype was  
336 not observed in *parg-2; him-5* double mutants, in which the number and structure of DAPI  
337 bodies resembled *him-5* single mutants both before and after exposure to IR (Fig. S6). We  
338 thus confirmed that the recombination defects observed in *parg-1; him-5* are specific to  
339 impaired *parg-1* function.

340

341 The SC is a dynamic structure that responds to the presence or absence of (as yet  
342 unidentified) CO intermediates in the nucleus. When COs are made, they stabilize the SC in  
343 *cis*. In genetic backgrounds with reduced DSB induction, such as those described above, the  
344 chromosome pairs lacking a CO undergo desynapsis at a late pachytene stage, whereas in  
345 mutants that completely lack COs, homologs remain fully synapsed but the SC subunits are  
346 more labile (Machovina et al., 2016; Pattabiraman et al., 2017). Given the partial rescue of  
347 chiasmata formation in *parg-1; him-5* double mutants after IR and the localization of PARG-1  
348 to the SC, we sought to determine if CO designation and SC dynamics are decoupled by  
349 simultaneous loss of both HIM-5 and PARG-1 functions.

350

351 In unirradiated *him-5* mutant worms, the sole absence of a CO on chromosome X caused its  
352 extensive desynapsis in late pachytene nuclei (Fig. 5A, C), recapitulating previous  
353 observations (Machovina et al., 2016). By contrast, in *parg-1; him-5* double mutants, the  
354 majority of nuclei showed full synapsis (Fig. 5A-C), in agreement with the fact that de-  
355 synapsis is not triggered when CO establishment is fully abrogated (Machovina et al., 2016;  
356 Pattabiraman et al., 2017). In support of this interpretation, we show that nuclei containing  
357 fully synapsed chromosomes displayed no COSA-1 loading in unirradiated *parg-1; him-5*  
358 double mutants (Fig. 5D). Immunostaining for H3K4me2, a histone modification that shows  
359 specific enrichment on the autosomes, but not on the X chromosome (Reuben and Lin,  
360 2002), further revealed that the X chromosome was fully synapsed in *parg-1; him-5* doubles,  
361 consistent with the lack of a CO and in stark contrast to *him-5* mutants (Fig. 5C).

362  
363 We next wanted to address whether SC stabilization and CO formation are coordinated in the  
364 *parg-1; him-5* double mutants after irradiation, where six COSA-1 foci were observed (Fig.  
365 5B) but univalents resulted (Fig. 4D). For this analysis, we undertook a time course analysis.  
366 In the *him-5* single mutant, 10 Gy of IR is sufficient to both rescue COSA-1 loading and to  
367 suppress X chromosome desynapsis as observed both 8 hr and 17 hr post-IR, as shown  
368 previously (Machovina et al., 2016). No defects were observed in the *parg-1* single mutants.  
369 In *parg-1; him-5*, COSA-1 foci numbers were also largely rescued at 8 hr post-IR and  
370 remained steady at 17-hours post-IR (Fig 5B). However, synapsis levels started to decline at  
371 8 hr post-IR and were further reduced at 17-hours after irradiation (Fig. 5A). Strikingly, a  
372 substantial number of nuclei exhibited desynapsis, yet they showed the full complement of  
373 six COSA-1 foci (8 hr= 52% and 17 hr= 74.3%) (Fig. 5D-E), a situation never described in  
374 other meiotic mutants. COSA-1 foci were never associated with unsynapsed chromosome(s)  
375 at the observed time points. The fact that these nuclei contain six COSA-1 foci, as in wild-

376 type animals, suggests that some chromosomes might bear additional COSA-1 marked CO  
377 events. These results revealed that the global regulation of CO-mediated DNA repair is  
378 profoundly perturbed in the absence of PARG-1 and HIM-5 functions.

379

380 To further characterize the defects in *parg-1; him-5* mutants, we examined the meiotic  
381 progression marker phospho-SUN-1<sup>S8</sup> (Penkner et al., 2009). In wild-type animals, SUN-1<sup>S8</sup>  
382 is phosphorylated in leptotene/ zygotene and dissipates at mid- pachytene (Woglar et al.,  
383 2013). The lack of DSBs or impaired homologous recombination-mediated repair trigger  
384 retention of phospho-SUN-1<sup>S8</sup> at the nuclear envelope until the late pachytene stage (Woglar  
385 et al., 2013). In DSB-defective mutants, but not in mutants with impaired recombination  
386 (such as *cosa-1*), delayed removal of phospho-SUN-1<sup>S8</sup> is rescued by exogenous DSB  
387 induction (Machovina et al., 2016; Rosu et al., 2013; Stamper et al., 2013; Woglar et al.,  
388 2013). Since *parg-1; him-5* double mutants appear to carry defects in both DSB induction and  
389 repair, we analyzed phospho-SUN-1<sup>S8</sup> localization before and after IR exposure to assess  
390 whether these phenotypes could be uncoupled by phospho-SUN-1<sup>S8</sup> dynamics.

391 *parg-1* mutants displayed mild prolongation of phospho-SUN-1<sup>S8</sup> staining (Fig. S6),  
392 consistent with the delayed accumulation of RAD-51 foci (Fig. 3A and S3). *him-5* and *parg-1;*  
393 *him-5* mutants showed comparable, prolonged phospho-SUN-1<sup>S8</sup> staining under  
394 unchallenged growth conditions, consistent with defective DSB induction and recombination.  
395 While IR exposure fully suppressed the persistence of phospho-SUN-1<sup>S8</sup> in the *him-5* as  
396 expected, it only mildly suppressed it in *parg-1; him-5* (Fig. S7). The inability of IR to  
397 suppress phospho-SUN-1<sup>S8</sup> accumulation further reinforces the conclusion that lack of both  
398 PARG-1 and HIM-5 impairs both meiotic DSB formation and repair.

399

400

401 **PARG-1 shapes the recombination landscape and reinforces CO interference**

402 Given the involvement of *parg-1* in regulating not only DSB formation, but also homology-  
403 mediated repair, we investigated the recombination frequency in different genetic intervals on  
404 chromosome I and V by monitoring SNP markers in Bristol/Hawaiian hybrids, which allowed  
405 us to assess both CO numbers and their position (Hillers and Villeneuve, 2009). We found a  
406 striking increase of COs in the central regions of both chromosomes (Fig. 6A-B), where COs  
407 are usually absent in the wild type (Lim et al., 2008). In addition, double and triple COs were  
408 observed, albeit at a low frequency. These results revealed that impaired *parg-1* function  
409 impacts the global levels and distribution of COs and weakens CO interference in *C. elegans*.

410

411 **PARG-1 catalytic activity is dispensable for meiotic functions**

412 We next sought to investigate whether PARG-1 catalytic activity is necessary to exert its  
413 function during meiosis. To this end, we generated a *parg-1* “catalytic-dead” mutant (referred  
414 to as *parg-1(cd)* hereafter) using CRISPR to mutate two glutamates in the catalytic domain  
415 (E554, 555A). These amino acids are conserved throughout evolution and were shown to be  
416 essential for PARG activity *in vitro* in both mammals and nematodes (Mortusewicz et al.,  
417 2011; Patel et al., 2005; St-Laurent et al., 2007). Immunostaining analysis in *parg-1(cd)* and  
418 *parg-1(cd)::GFP* revealed accumulation of PAR on meiotic chromosome axes as in *parg-*  
419 *1(gk120)* null mutants, indicating that also *in vivo* E554-E555 are necessary for PAR removal  
420 (Fig. S8). PARG-1<sup>CD</sup>::GFP was expressed and loaded in meiocytes (Fig. 7A) but displayed  
421 prolonged localization along the chromosomes in late pachytene cells, were PARG-1  
422 normally is retained mostly at the short arm of the bivalent in control animals (Fig. 2).  
423 Western blot analysis showed that the overall levels of both PARG-1<sup>CD</sup>::GFP and untagged  
424 PARG-1<sup>CD</sup> were indeed increased, ruling out possible artifacts due to the addition of GFP

425 (Fig. 7B). The blots were also probed with anti-PAR antibodies and this confirmed that PAR  
426 accumulates in strains with compromised glycohydrolase activity (Fig. 7B).

427

428 To assess whether the catalytic activity of PARG-1 was required for the induction and/or  
429 repair of meiotic DSBs, we analyzed the *parg-1(cd); him-5* double mutants as described  
430 above. Offspring viability was only mildly reduced compared to *him-5* mutants (Fig. 7C). This  
431 indicates robust establishment of chiasmata in contrast to the *parg-1(gk120); him-5* double  
432 mutants. Similarly, X chromosome desynapsis (Fig. 7D-E) and its consequent nondisjunction  
433 (Fig. 7F) were rescued to the same extent upon IR exposure in both *parg-1(cd); him-5* and  
434 *him-5* mutants, unlike the lack of rescue in *parg-1(gk120); him-5* (Fig. 5A). These results  
435 suggest that PARG-1 loading onto chromosomes and/or a non-catalytic function of PARG-1  
436 are essential to avert recombination defects in the absence of HIM-5. This interpretation was  
437 reinforced by the observation that the simultaneous removal of *parp-1* and *parp-2* did not  
438 rescue CO formation in *parg-1(gk120); him-5* mutants (Fig. 7F), indicating that CO defects  
439 are independent of PAR. Thus, we conclude that the glycohydrolase activity of PARG-1 is not  
440 required to promote induction of meiotic DSBs and their homologous recombination-mediated  
441 repair.

442

## 443 Discussion

444 PARylation has been extensively studied in the context of the DNA damage response in  
445 mitotic mammalian cells, where it facilitates the repair of DNA lesions by promoting both the  
446 recruitment of repair factors and mediating local chromatin relaxation around damage sites  
447 (Gibson and Kraus, 2012; Gupte et al., 2017; Ray Chaudhuri and Nussenzweig, 2017;  
448 Weaver and Yang, 2013). In contrast to PARP1/2, the functions of PARG have been much  
449 less investigated due to the lack of a suitable model system, since PARG null mutants are

450 embryonic lethal in mammals (O'Sullivan et al., 2019). We found that the *C. elegans* PARG-1  
451 regulates DSB induction, in parallel to the so far known HIM-17/HIM-5/DSB-1/DSB-2-  
452 dependent routes. Moreover, our data demonstrate that PARG-1 regulates homology-  
453 directed repair of DSBs by operating within a functional module with HIM-5 to ensure the  
454 efficient conversion of recombination intermediates into post-recombination products,  
455 ultimately controlling global CO numbers.

456

457 Our cytological analysis, in combination with co-immunoprecipitation assays (Fig. 2),  
458 identified PARG-1 as an intrinsic component of the SC, where it is recruited *via* interaction  
459 with the chromosome axis protein HTP-3. Studies in mammalian mitotic cells reported  
460 nucleoplasmic localization of PARG and robust recruitment onto the DNA lesions induced by  
461 laser microirradiation (Kaufmann et al., 2017; Mortusewicz et al., 2011). The association with  
462 a meiosis-specific structure such as the SC therefore suggests distinct functional regulation  
463 in meiotic cells. Interestingly, PARG-1 retracts to the short arm of the bivalent and becomes  
464 enriched with SYP proteins at the presumptive CO sites in late pachytene nuclei (Fig. 2C-D),  
465 a localization also described for DNA repair and CO-promoting factors (Bhalla et al., 2008;  
466 Janisiw et al., 2018; Jantsch et al., 2004; Li et al., 2018). Nevertheless, abrogation of  
467 synapsis did not impair loading of PARG-1 along the chromosomes, a prerogative typically  
468 observed for axial rather than central components of the SC (de Carvalho et al., 2008;  
469 Goodyer et al., 2008; Martinez-Perez and Villeneuve, 2005; Zetka et al., 1999). This would  
470 suggest that PARG-1 may be targeted to both lateral and central elements of the SC or shift  
471 from the former to the latter upon CO-mediated chromosome remodeling.

472 In support of a dynamic model of PARG-1 localization, PARG-1 was found in protein  
473 complexes both with HTP-1, HTP-3 and REC-8, all proteins localizing to chromosome axes  
474 (Goodyer et al., 2008; Martinez-Perez et al., 2008; Pasierbek et al., 2001), and also with



475 SYP-3, which is a component of the central part of the SC (Smolikov et al., 2007). We believe  
476 that the localization of PARG-1 to the chromosome axes and its interaction with HTP-3 might  
477 hold crucial functional implications for promoting formation of meiotic DSBs. Many axial  
478 proteins, including *C. elegans* HTP-3, have been shown to directly influence abundance of  
479 DSBs during meiosis in several organisms (Goodyer et al., 2008; Kleckner, 2006), and  
480 therefore PARG-1 might exert its pro-DSB functions by operating from within the SC.

481

482 An activity of PARG-1 in promoting meiotic DSB formation by directly regulating pro-DSB  
483 factors is less likely, since the synergistic effects between *parg-1* and *him-17-him-5-dsb-2*  
484 mutants (Fig. 4, Fig. S5) clearly place PARG-1 in a parallel, distinct pathway. Consistently,  
485 expression and localization of PARG-1 and HIM-17, HIM-5 or DSB-2 were not mutually  
486 dependent (Fig. S5). We cannot rule out the possibility that PARG-1 may contribute to DSB  
487 formation by modulating SPO-11 activity or its recruitment to the presumptive DNA break  
488 sites. However, this is an unlikely scenario, since neither defects in bivalent formation nor  
489 RAD-51 loading were observed in *parg-1* mutants (Fig. 3; Fig. S2 and S3), as one might  
490 expect much more severe defects for as general loading problem. An additional argument in  
491 support of a model where interaction with HTP-3 might be key for PARG-1-mediated pro-  
492 DSB function, comes from its co-immunoprecipitation with MRE-11 (Fig. 4E), a proven  
493 interaction partner of HTP-3 (Goodyer et al., 2008). MRE-11 holds important roles in break  
494 resection and in *C. elegans* also break formation across species (Johzuka and Ogawa, 1995;  
495 Yin and Smolikove, 2013). MRE-11 has been invoked as a putative substrate intersected by  
496 HTP-3 function in inducing meiotic breaks (Goodyer et al., 2008). Therefore, PARG-1 might  
497 act together with HTP-3 and MRE-11 to ensure normal levels of breaks.

498



499 Our analysis also revealed that PARG-1, both independently and in combination with HIM-5,  
500 plays important roles in the global regulation of meiotic recombination. In fact, *parg-1* mutants  
501 show a profoundly perturbed recombination landscape, as distribution of COs displayed a  
502 marked shift towards the center of the autosomes (Fig. 6), a chromosome domain normally  
503 devoid of COs in wild-type animals (Barnes et al., 1995). This feature has also been  
504 observed in mutants with reduced levels bivalent formation or aberrant DSB repair (Jagut et  
505 al., 2016; Li et al., 2018; Meneely et al., 2012; Saito et al., 2013; Saito et al., 2009).  
506 Moreover, CO interference appeared weakened in absence of *parg-1*, suggesting a  
507 diminished stringency in the control of CO numbers.

508  
509 The intermediates formed upon abrogation of *parg-1* function are nonetheless fully  
510 competent to be processed as COs, as long as HIM-5 function is preserved. In fact, while  
511 bivalent formation was fully restored in *parg-1; him-17* double mutants upon IR exposure  
512 (Fig. 4D) (arguing for a rescue of reduced DSB levels), diakinesis of irradiated *parg-1; him-5*  
513 mutant worms showed only a partial restoration of chiasmata, highlighting a repair defect as  
514 well (Fig. 4D). The mutual requirement of PARG-1 and HIM-5 in the reciprocal mutant  
515 background suggests the presence of a repair mechanism that relies on these two factors in  
516 order to efficiently complete interhomolog recombination repair. Both *him-5* and *dsb-2* exert  
517 regulatory functions on DNA repair pathway choice during gametogenesis (Macaisne et al.,  
518 2018) and our work also highlights *parg-1* as an important factor operating within such a  
519 process. This is also exemplified by our finding that diakinesis nuclei in *parg-1; mre-11(iow1)*  
520 display intact, well-shaped univalents both before and after IR exposure, in contrast to the  
521 chromatin clumps observed in the *mre-11(iow1)* separation of function mutant (Fig. 3) (Yin  
522 and Smolikove, 2013), indicating that PARG-1 can act as a switch in channeling DSB repair  
523 into multiple branches.

524 Simultaneous abrogation of *parg-1* and *him-5* function caused much more severe aberrations  
525 than just reduced recombination: we found that IR exposure restored COSA-1 loading to the  
526 wildtype levels (six foci/nucleus) in pachytene cells (consistent with impaired break  
527 formation); nevertheless large portions of chromatin, possibly corresponding to whole  
528 chromosome pairs rather than local regions, were devoid of SYP-1/COSA-1 in many of these  
529 nuclei. These data indicate that additional COs have been designated on remaining, SC-  
530 associated chromosomes (Fig. 5).

531

532 Previous studies in *ex vivo* somatic cells suggested possible functions of PARG that are  
533 independent of its catalytic activity or PAR synthesis (Mortusewicz et al., 2011).  
534 Our data show that in catalytically impaired *parg-1(cd)* mutants, which consistently  
535 accumulate PAR as in *parg-1(gk120)* nulls (Fig. S8), the inactive protein was recruited at  
536 higher levels and displayed delayed redistribution along the chromosomes in late pachytene  
537 nuclei (Fig. 7A). This is in agreement with reports in mammalian cells showing that PARG<sup>KD</sup>  
538 is recruited to laser-induced microirradiation sites with faster kinetics compared to PARG<sup>WT</sup>  
539 and that this recruitment is only partially dependent on the PARP1 function (Mortusewicz et  
540 al., 2011). Strikingly, PARG-1<sup>CD</sup>::GFP was still capable of promoting chiasmata formation on  
541 the autosomes in *him-5* mutants: in fact, the embryonic viability and numbers of DAPI-bodies  
542 in *parg-1(cd); him-5* were comparable to *him-5* single mutants before and after IR exposure,  
543 and importantly, desynapsis was not observed. This suggests that the loading of PARG-1,  
544 rather than its enzymatic activity for PAR removal, was sufficient to induce DSBs and  
545 promote efficient bivalent formation in the presence of exogenous DSBs (Fig. 7). This was  
546 further corroborated by the fact that in the *parp-1; parp-2; parg-1(gk120); him-5* quadruple  
547 mutants, bivalent formation was not rescued, demonstrating that the roles exerted by PARG-  
548 1 in promoting DSB induction and meiotic repair are independent of PARylation.

549 Altogether, we demonstrate that the catalytic activity and the scaffolding properties of PARG  
550 are required for distinct cellular processes. Our study establishes a crucial role of PARG  
551 during meiotic prophase I in augmenting induction of meiotic DSBs and regulating their repair  
552 via HR in a metazoan model. Further studies are necessary to clarify whether PARG-1  
553 recruitment affects the structure of the SC resulting in the modulation of DSB formation and  
554 recombination, or whether the presence of PARG-1 along the chromosomes influences the  
555 recruitment and dynamic behavior of other factors, which ultimately exert a regulatory role in  
556 DSB formation and recombination. Our work highlights the multifaceted aspects of PARG *in*  
557 *vivo* not simply as an enzyme mediating the catabolism of PAR, but also as a pivotal factor  
558 intersecting multiple functional branches acting during meiosis.

559

## 560 **Acknowledgements**

561 We are grateful to E. Martinez-Perez, M. Zetka, A. Villeneuve, Y. Kim and S. Smolikove for  
562 strains and reagents; A. Graf for performing the microinjections; D. Slade for helpful  
563 comments and discussion throughout the development of this work; L. Krejčí, S. Uldrijan and  
564 D. Šmajš for sharing equipment. Some strains were provided by the CGC, which is funded by  
565 NIH Office of Research Infrastructure Programs (P40 OD010440). NS was funded by an  
566 Interdisciplinary Cancer Research (INDICAR) fellowship by the Mahlke-Obermann Stiftung  
567 and the European Union's Seventh Framework Programme for Research, Technological  
568 Development under grant agreement no 609431 and a “Start-Up” grant from the Department  
569 of Biology of Masaryk University. VJ lab receives funding by the Austrian Science  
570 Fund (FWF; project no. P-31275-B28); AVH lab by DK Population Genetics (UW: W1225-  
571 B20), DK RNA (UW: W1207) and FWF URSPRUNG 2018 (I-1824-B22); JLY lab by NIGMS  
572 (2 R01 GM104007); MR was funded in part by an MWRI post-doctoral fellowship. We  
573 acknowledge the core facility CELLIM of CEITEC supported by the Czech-Biolmaging large

574 RI project (LM2018129 funded by MEYS CR) for their support with obtaining scientific data  
575 presented in this paper.

576

### 577 **Author contributions**

578 NS designed the research and performed most of the experiments with the technical support  
579 of EJ; MR, FB and JLY generated some strains, analyzed diakinesis chromosomes, and  
580 performed the recombination assay on chromosome I; LPP and AVH analyzed whole  
581 genome sequencing data, which initiated the analysis of the catalytic-dead *parg-1* mutants;  
582 AB produced the *HA::rmh-1* tagged line; VJ provided logistic, infrastructure, resources and  
583 conceptual support; JLY, VJ and NS wrote the manuscript.

584

### 585 **Declaration of Interests**

586 The authors declare no competing interests.

587

### 588 **Figure Legends**

589 **Figure 1. PARG-1 is the main ADP-ribose glycohydrolase in *C. elegans*.**

590 **(A)** Schematic representation of *parg-1* and *parg-2* genetic loci. *parg-1* is predicted to encode  
591 numerous isoforms and for simplicity only the transcript encoding isoform A is shown. Red  
592 lines delineate the position of deletions in the indicated mutant alleles. **(B)** Screening of  
593 brood-size, embryonic lethality and segregation of males in indicated genetic backgrounds.  
594 Number of embryos scored: WT (1196), *parg-1::GFP* (1389), *parg-1(gk120)* (1200), *parg-*  
595 *2(DDR20)* (1304) and *parg-1(gk120) parg-2(DDR20)* (1271). **(C)** Representative images of  
596 whole-mount gonads from indicated genotypes showing detection of PAR by  
597 immunofluorescence. Scale bar 20  $\mu$ m. **(D)** Left: representative pictures of late pachytene  
598 nuclei from indicated genotypes showing *parg-1*- and *parg-2*-dependent accumulation of PAR

599 in *parg-1* mutants. Gonads were divided into 7 zones, encompassing the region from the  
600 distal tip cell to diplotene. Scale bar 5  $\mu$ m. Right: quantification of PAR detected by  
601 immunofluorescence. Chart reports average of fluorescence intensity from at least two  
602 gonads/genotype. Error bars indicate standard deviation.

603

604 **Figure 2. PARG-1 interacts with SC components and requires chromosome axes for**  
605 **proper localization.**

606 **(A)** Western blot analysis of fractionated extracts detects PARG-1 in all subcellular  
607 compartments with enrichment in the chromatin-bound fraction. CY= cytosol, NS= nuclear  
608 soluble, CB= chromatin bound. GAPDH was used as a loading control of the cytosolic  
609 fraction and Histone H3 for the chromatin bound fraction. **(B)** Western blot analysis of  
610 fractionated extracts showing similar expression of GFP-tagged and untagged PARG-1. **(C)**  
611 Top: PARG-1::GFP localization in a wild-type gonad. Scale bar 30  $\mu$ m. Bottom: enlarged  
612 insets showing dynamic localization of PARG-1::GFP in different stages of meiotic prophase  
613 I. Scale bar 5  $\mu$ m. **(D)** Mid- and late-pachytene nuclei of *parg-1::GFP* co-stained for lateral  
614 (HTP-1 and -3) and central component (SYP-1) of the SC. Scale bar 5  $\mu$ m. **(E)** Late  
615 pachytene nuclei showing overlapping localization of PARG-1::GFP with OLLAS::COSA-1.  
616 Scale bar 5  $\mu$ m. **(F)** Late pachytene nuclei stained for HTP-1, SYP-1 and GFP showing  
617 localization of PARG-1 along chromosomes. In *cosa-1* mutants redistribution to the short arm  
618 of the bivalent is absent. Scale bar 5  $\mu$ m. **(G)** Impaired axes formation in *htp-3* mutants  
619 prevents PARG-1::GFP localization. Scale bar 5  $\mu$ m. **(H)** PARG-1::GFP associates with HTP-  
620 3 in late-pachytene nuclei in absence of synapsis. Scale bar 5  $\mu$ m. **(I)** Western blot analysis  
621 of endogenous PARG-1 on GFP pull downs performed in *htp-3::GFP* and *GFP::syp-3*  
622 strains. Wild-type worms were used as the untagged negative control. **(J)** Western blot

623 analysis of endogenous PARG-1 on GFP pull downs performed in *htp-1::GFP* and *rec-8::*  
624 *GFP* strains.

625

626 **Figure 3. Elimination of *parg-1* function suppresses chromosome abnormalities in**  
627 **resection-defective mutants.**

628 **(A)** *parg-1* mutants display SPO-11-dependent accumulation of RAD-51 foci. Error bars  
629 represent S.E.M. **(B)** Representative examples of cells at different stages of the same  
630 genotypes analyzed in A. Scale bar 5  $\mu$ m. **(C)** Analysis of diakinesis nuclei in different  
631 genotypes before and 27h after exposure to IR. Error bars represent standard deviation.  
632 Statistical analysis was performed with non-parametric Mann-Whitney test. \*\*\* indicates  
633  $p < 0.0001$  and *ns* indicates statistically non-significant differences. **(D)** Representative images  
634 of diakinesis nuclei of the same genotypes scored in C. Scale bar 5  $\mu$ m.

635

636 **Figure 4. PARG-1 promotes formation of meiotic DSBs and interacts with MRE-11.**

637 **(A)** Schematic representation of the gonad divided into five equal regions spanning transition  
638 zone throughout late pachytene, employed for MSH-5 and RMH-1 foci quantification. **(B)**  
639 Quantification of GFP::*MSH-5* foci in the indicated genotypes before and after IR. Error bars  
640 indicate standard deviation. **(C)** Quantification of HA::*RMH-1* foci in the indicated genotypes  
641 before and after IR. **(D)** Quantification of DAPI-bodies of different genotypes before and after  
642 IR exposure. **(E)** Western blot analysis of endogenous PARG-1 on GFP pull downs  
643 performed in *mre-11::GFP* and untagged wildtype strains (negative control).

644

645 **Figure 5. PARG-1 and HIM-5 regulate CO numbers.**

646 **(A)** Quantification of synapsis in late pachytene nuclei without IR and at different times after  
647 IR exposure, by SYP-1 and HTP-3 co-staining. Only nuclei showing complete colocalization

648 of HTP-3 and SYP-1 were considered fully synapsed. Quantification was performed in the  
649 last seven rows of nuclei before entering the diplotene stage. Error bars indicate S.E.M. **(B)**  
650 Quantification of OLLAS::COSA-1 foci formation in late pachytene nuclei in the same  
651 genotypes and at the same time points as in A. **(C)** Immunostaining of H3K4me2, HTP-3 and  
652 SYP-1 to assess chromosome X synapsis in different genotypes. Scale bar 5  $\mu\text{m}$ . **(D)** Co-  
653 staining of OLLAS::COSA-1 with SYP-1 and HTP-3 shows de-synapsis associated with lack  
654 of CO but normal numbers of COSA-1 foci on the remaining chromatin in *parg-1; him-5*  
655 double mutants. Scale bar 5  $\mu\text{m}$ . Arrows indicate examples of unsynapsed regions in nuclei  
656 containing six COSA-1 foci. **(E)** High magnification of late pachytene *parg-1; him-5* nuclei  
657 after 8h (top) and 17h (bottom) post irradiation of showing normal numbers of COSA-1 foci  
658 despite de-synapsis. Arrows indicate desynapsed chromosome regions (presence of HTP-3,  
659 absence of SYP-1). Scale bar 1  $\mu\text{m}$ .

660

661 **Figure 6. Loss of *parg-1* alters the recombination landscape and weakens CO**  
662 **interference.**

663 **(A)** Top: schematic representation of the genetic position of the SNPs employed to assess the  
664 recombination frequency on chromosome I. PC indicates the position of the pairing center.  
665 Middle: recombination frequencies assessed in each of the genetic intervals in wild type and  
666 *parg-1* null mutants. Bottom: table displaying number and percentage of single, double and  
667 triple crossovers (SCO, DCO and TCO respectively) in both genotypes. *n* indicates number  
668 of worms analyzed. **(B)** Same analysis as in A, performed for chromosome V.

669

670 **Figure 7. PARG-1 catalytic activity is dispensable for recombination.**

671 **(A)** Left: immunofluorescence of late pachytene nuclei showing elevated levels of PARG-  
672  $1^{\text{CD}}$ ::GFP versus PARG-1::GFP and delayed redistribution. Right: insets depicting magnified



673 nuclei from left. Scale bar 10  $\mu\text{m}$ . **(B)** Western blots with fractionated extracts show higher  
674 PARG-1<sup>CD</sup>::GFP and PARG-1<sup>CD</sup> abundance compared to controls. Anti-histone H3 was used  
675 as loading control for chromatin-bound fraction. Western blot (bottom) confirmed  
676 accumulation of PAR in both *parg-1(cd)* and *parg-1(gk120)* null mutants. **(C)** Blocking PARG-  
677 1 catalytic activity causes milder synergistic effects when combined with *him-5* mutants in  
678 contrast to *parg-1(gk120); him-5*. **(D)** De-synapsis of the X chromosome is fully rescued by IR  
679 exposure in *parg-1(cd); him-5* double mutants. Arrows indicate the unsynapsed X  
680 chromosome in the indicated genotypes before irradiation. Scale bar 10  $\mu\text{m}$ . **(E)**  
681 Quantification of synapsis by SYP-1 and HTP-3 co-stainings in the indicated genotypes  
682 before and after IR exposure. Error bars indicated S.E.M. **(F)** DAPI-stainings (left) and  
683 quantification of DAPI-bodies in diakinesis nuclei (right) for the indicated genotypes. Error  
684 bars indicate standard deviation. Scale bar 5  $\mu\text{m}$ .

685

## 686 **Methods**

### 687 **Genetics**

688 Worms were cultured at 20°C according to standard conditions. The N<sub>2</sub> strain was used as  
689 the wild-type control. We did not notice any significant differences between *him-17(e2707)*  
690 and *him-17(e2806)* alleles and the former has been employed for the majority of the  
691 experiments unless otherwise indicated. The *parp-1(DDR31)* is a full knock-out generated by  
692 CRISPR. A full list of the strains employed for this study are in Table S3.

693

### 694 **Screenings**

695 L4 worms were individually plated and moved onto fresh plates every 12 hours for three  
696 days. Dead eggs were scored 24 hours after the mother had been removed and male



697 progeny after three days. Embryonic lethality and male progeny were calculated as the  
698 fraction of unhatched eggs/total laid eggs and males/total hatched eggs respectively.

699

## 700 **Cytological procedures and image acquisition**

701 For immunostaining experiments, synchronized worms of the indicated age were dissected  
702 and processed as previously described (Janisiw et al., 2018) except for detection of PARG-  
703 1::GFP and GFP::MSH-5. Briefly, worms were dissected in PBS and immediately placed in  
704 liquid nitrogen. Slides were placed in cold methanol at -20°C for 1' and then fixed with 2%  
705 PFA in 0.1M K<sub>2</sub>HPO<sub>4</sub> (pH 7.4) for 10' in a humid chamber at room temperature. Samples  
706 were then processed as for regular staining. For GFP::MSH-5 detection, worms were  
707 dissected and fixed in 2.5% PFA for 2' at room temperature and then freeze-cracked in liquid  
708 nitrogen. Slides were placed in absolute ethanol at -20°C for 10' and then washed in 1x  
709 PBST. DAPI staining was performed as for normal staining and GFP was directly acquired  
710 without employing a primary anti-GFP antibody. For quantification of PAR (Figure 1E),  
711 samples were acquired with identical settings and equally adjusted in Fiji. Gonads were  
712 divided into seven equal regions from mitotic tip to diplotene entry and a circle of fixed area  
713 was employed to assess absolute fluorescence in each nucleus with Fiji as in (Janisiw et al.,  
714 2018). Between two and three germlines for each genotype were used for quantification.  
715 Number of nuclei scored was (from zone 1 to 7): WT (97, 129, 115, 107, 102, 74, 45), *parg-*  
716 *1(gk120)* (129, 136, 140, 129, 130, 96, 82), *parp-1(DDR31)*; *parg-1(gk120)* (93, 113, 123, 129,  
717 102, 69, 44), *parp-2(ok344)*; *parg-1* (190, 263, 215, 179, 179, 125, 72), *parp-1(DDR31)*; *parp-*  
718 *2(ok344)*; *parg-1(gk120)* (107, 140, 134, 144, 126, 103, 76).

719 For quantification of RAD-51 foci, gonads were divided into seven equal regions from the  
720 mitotic tip to the diplotene entry and number of RAD-51 foci was counted in each nucleus.

721 Number of nuclei analyzed is reported in Table S2.

722 Quantification of phospho-SUN-1<sup>S8</sup> extension was performed as in (Link et al., 2018).  
723 Most images were captured using a Delta Vision system equipped with an Olympus IX-71  
724 microscope and a Roper CoolSNAP HQ2 camera with Z-stack set at 0.25 µm of thickness.  
725 Images in Figure 7D and 7F, were acquired with a Delta Vision system equipped with an  
726 Evolve 512 EMCCD Camera and an upright fluorescence microscope Zeiss AxioImager.Z2  
727 equipped with a Hamamatsu ORCA Flash 4.0, sCMOS sensor camera respectively, using  
728 UPlanSApo 100x/1.4 Oil objective. All images were deconvolved using Softworx (Applied  
729 Precision) except for images in Figure 7F, which are non-deconvolved.

730

### 731 **Antibodies**

732 The following antibodies at the indicated dilutions were employed for immunolocalization  
733 studies: rabbit polyclonal anti HA (SIGMA, 1:1000), rabbit polyclonal anti OLLAS (Genscript,  
734 1:1500), rabbit polyclonal anti PAR (Trevigen, 1:1000), mouse monoclonal anti GFP (Roche,  
735 1:500), guinea pig polyclonal anti HTP-3 (1:500) (Goodyer et al., 2008), guinea pig polyclonal  
736 anti HTP-3 (1:750) (Y. Kim lab), chicken polyclonal anti SYP-1 (1:500) (Silva et al., 2014),  
737 rabbit polyclonal anti HTP-1 (1:500) (Martinez-Perez et al., 2008), rabbit polyclonal anti RAD-  
738 51 (Novus, 1:10,000), guinea pig polyclonal anti phospho-SUN-1<sup>S8</sup> (1:750) (Woglar et al.,  
739 2013), rabbit polyclonal anti DSB-2 (1:5000) (Rosu et al., 2013), guinea pig polyclonal anti  
740 XND-1 (1:2500) (Wagner et al., 2010), mouse monoclonal anti H3K4me2 (Millipore, 1:250).  
741 All the secondary antibodies were Alexafluor-conjugated and used at 1:500.

742 The following antibodies at the indicated dilutions were employed in western blot analysis:  
743 rabbit polyclonal anti HA (SIGMA, 1:3000), mouse monoclonal anti HA (Cell Signalling,  
744 1:1000), mouse monoclonal anti PARG-1 (this study, 1:500), chicken polyclonal anti GFP  
745 (Abcam, 1:4000), rabbit polyclonal anti Histone H3 (Abcam, 1:100,000), goat polyclonal anti  
746 actin (Santa Cruz, 1:3000), mouse monoclonal anti Tubulin (Thermofisher, 1:2000), mouse

747 monoclonal anti GAPDH (Ambion, 1:5000). Secondary antibodies were purchased from  
748 Thermofisher and were HRP-conjugated.

749

## 750 **Biochemistry**

751 Fractionated protein extracts were produced as previously described (Silva et al., 2014) and  
752 co-immunoprecipitation assays and Western Blot were performed as previously shown  
753 (Janisiw et al., 2018). At least 500 $\mu$ g of nuclear extract (pooled nuclear-soluble and  
754 chromatin-bound fractions) were used for IPs. Agarose GFP-traps (Chromotek) were  
755 employed for pull downs following manufacturer instructions. Buffer D (20mM HEPES pH 7.9,  
756 150mM KCl, 20% glycerol, 0.2mM EDTA, 0.2% Triton X-100 and complete protease inhibitor)  
757 was used for incubation with beads and washes.

758

## 759 **Generation of anti-PARG-1 antibody**

760 To generate the mouse monoclonal anti PARG-1(2D4) antibody, the cDNA encoding for  
761 residues 1-350 of *C. elegans* PARG-1 (isoform A) was generated by gene synthesis (IDT)  
762 and then cloned into pCoofy31 in frame with a C-ter 6xHis tail. The resulting plasmid was  
763 expressed in *E. coli* BL21 cells according to standard procedures and 1 mg of purified protein  
764 was used to immunize three mice in the “in-house” monoclonal antibody facility at Max Perutz  
765 Laboratories ([https://www.maxperutzlabs.ac.at/research/facilities/monoclonal-antibody-](https://www.maxperutzlabs.ac.at/research/facilities/monoclonal-antibody-facility)  
766 [facility](https://www.maxperutzlabs.ac.at/research/facilities/monoclonal-antibody-facility)). Raw sera were screened by western blot employing extracts produced from WT,  
767 *parg-1(gk120)* and *parg-1::GFP* worms in order to identify immunoreactive bands against  
768 PARG-1. Spleen cells from one mouse were fused with myeloma cells to generate hybridoma  
769 cell lines and mixed clones were successively diluted to gain monoclonal line 2D4, from  
770 which the antibody was harvested. Antibody specificity was assessed by western blot, where

771 an immune reactive band of the expected Mw of approximately 90kDa in WT but not in *parg-*  
772 *1* mutant worms was detected (Fig.2A).

773

#### 774 **Irradiation**

775 Irradiation assays were performed as previously described (Janisiw et al., 2018). For  
776 quantification of synapsis and OLLAS::COSA-1 foci number in late pachytene nuclei, worms  
777 were dissected at the indicated time after irradiation and quantification was performed in the  
778 last seven rows of nuclei before diplotene entry. For quantification of HA::RMH-1 and  
779 GFP::MSH-5 in Figure 4, worms were dissected 8h post-IR and gonads from transition zone  
780 to late pachytene were divided into five equal regions and number of foci/nucleus was  
781 assessed. For diakinesis analysis, worms were dissected 24-27 hours post irradiation. The  
782 dose employed for all irradiation experiments was 10 Gy.

783 Number of nuclei analyzed for each condition are reported in Table S1 and S2.

784

#### 785 **CRISPR-Cas9 genome editing**

786 Generation of tagged or mutated lines was performed as previously described (Janisiw et al.,  
787 2018). Briefly, to tag endogenous locus of *parg-1*, GFP was amplified by PCR with primers  
788 carrying 25 base pairs of homology to the left and right side of the STOP codon of *parg-1*  
789 gene. To generate the PARG-1<sup>E555,556A</sup> catalytic dead mutant, a synthetic ultramer (IDT) was  
790 employed, in which we included silent mutations to produce an Alu I restriction site for  
791 screening purposes. The mutations were generated in both WT and *parg-1::GFP* genetic  
792 backgrounds. To elicit a full knock-out of *parg-1*, we employed two sgRNAs targeting the  
793 beginning and the end of the gene. The *him-17::3xHA* and *him-5::3xHA* were generated by  
794 employing synthetic DNA ultramers (IDT) and N2 worms were injected. All the tagged lines  
795 carried a 5x-Gly linker between the tag and the coding region. The *parg-1<sup>gk120</sup>* line carries the

796 same deletion present in the VC130 strain, which we generated in both WT and CB4856  
797 strains. All the lines generated by CRISPR were outcrossed to WT worms at least twice  
798 before use.

799

## 800 **Recombination Assay**

801 The recombination landscape was assessed following the same strategy as in (Hillers and  
802 Villeneuve, 2003), by exploiting different Dra I digestion pattern of SNPs present in the Bristol  
803 and Hawaiian genetic backgrounds. Briefly, *parg-1(gk120)* and *parg-1(cd)* mutations were  
804 generated by CRISPR in both the N2 (Bristol) and CB4856 (Hawaii) strains. Bristol/Hawaiian  
805 F1 hermaphrodite hybrids carrying the indicated mutations were backcrossed to Bristol males  
806 carrying a tdTomato fluorescent reporter expressed in the soma in order to monitor  
807 recombination frequency in the oocytes. The relevant regions containing the SNPs for  
808 chromosomes I and V in the indicated genetic intervals were amplified by PCR and the  
809 products digested with Dra I to monitor recombination patterns. Data presented in Figure 6  
810 refer to the total number of worms analyzed in independent replicates.

811

## 812 **Supplementary Figure Legends**

### 813 **Figure S1. PAR accumulates in absence of endogenous DSBs.**

814 Immunostaining analysis showing accumulation of PAR in *parg-1* mutants even in absence of  
815 SPO-11-induced DSBs. *parg-1::GFP* does not accumulate PAR, indicating functionality of the  
816 fusion protein. Scale bar 10  $\mu$ m.

817

818

819

820

821 **Figure S2. PARG-1 is dispensable for synapsis and CO formation.**

822 **(A)** Staining of SYP-1 and HTP-3 shows no abnormalities in *parg-1(gk120)* mutants  
823 compared to wild-type (WT) animals. **(B)** Quantification of DAPI-bodies (left) and  
824 representative examples (right) of diakinesis nuclei in the indicated genotypes. Scale bar 2  
825  $\mu\text{m}$ .

826

827 **Figure S3. Abrogation of *parg-1* function causes reduced amounts of RAD-51 foci in**  
828 ***him-5* and *him-17* mutants.**

829 **(A)** Quantification of RAD-51 foci throughout the germline in the indicated genotypes (top)  
830 and representative images of mid-pachytene nuclei stained with DAPI and anti RAD-51  
831 (bottom). Error bars indicate S.E.M. Statistical analysis was performed using non-parametric  
832 two-tailed Mann-Whitney test. ( $***p < 0.0001$ ;  $**p = 0.0036$ ). **(B)** Removal of *parg-1* causes  
833 synthetic lethality in DSB-defective mutants. **(C)** The CO defects in *dsb-2* mutants are  
834 exacerbated by lack of PARG-1.

835

836 **Figure S4. Loss of PARG-1 impairs loading of pro-CO factors in *him-5* and *him-17***  
837 **mutants.**

838 **(A)** Late pachytene nuclei of different genotypes stained for GFP (MSH-5) before and after  
839 IR. **(B)** Late pachytene nuclei of different genotypes stained for HA (RMH-1) and OLLAS  
840 (COSA-1) before and after IR Scale bar 10  $\mu\text{m}$ .

841

842 **Figure S5. PARG-1 and pro-DSB factors display a mutually independent loading.**

843 **(A)** Viability and male progeny assessment revealed full functionality of *him-5::3xHA* and  
844 *him-17::3xHA* tagged lines compared to respective mutant backgrounds. **(B)** HIM-5 shows  
845 normal loading in *parg-1* mutant germlines. Scale bar 20  $\mu\text{m}$ . **(C)** HIM-17 and XND-1 do not

846 display loading abnormalities in *parg-1* mutants. Scale bar 20  $\mu\text{m}$ . **(D)** *parg-1* is not required  
847 for DSB-2 loading. Scale bar 20  $\mu\text{m}$ . **(E)** Loading of PARG-1 is not dependent on *him-5*, *him-*  
848 *17* and *dsb-2*. Scale bar 20  $\mu\text{m}$ .

849

850

851 **Figure S6. Loss of *parg-2* does not cause synthetic phenotypes with *him-5*.**

852 **(A)** Quantification of DAPI-bodies in diakinesis nuclei of the indicated genotypes before and  
853 after IR exposure. **(B)** Representative images of diakinesis nuclei of the indicated genotypes  
854 stained with DAPI. Scale bar 5  $\mu\text{m}$ .

855

856 **Figure S7. IR does not fully suppress accumulation of pSUN-1<sup>S8</sup> in *parg-1*; *him-5***

857 **double mutants.**

858 **(A)** Quantification of pSUN-1<sup>S8</sup>-positive nuclei cell rows in the indicated genotypes before and  
859 after IR exposure. **(B)** Representative whole-mount gonads of the indicated genotypes before  
860 and after irradiation, stained for pSUN-1<sup>S8</sup> and DAPI. Scale bar 30  $\mu\text{m}$ .

861

862 **Figure S8. PARG-1<sup>E554,555A</sup> is a “catalytic-dead” mutant of PARG-1.**

863 Left: whole-mount germlines of the indicated genotypes stained with anti-PAR antibodies and  
864 DAPI. Right: PAR staining. Scale bar 20  $\mu\text{m}$ .

865

## 866 **References**

867 Alpi, A., Pasierbek, P., Gartner, A., and Loidl, J. (2003). Genetic and cytological  
868 characterization of the recombination protein RAD-51 in *Caenorhabditis elegans*.  
869 *Chromosoma* 112, 6-16.

870 Ame, J.C., Fouquerel, E., Gauthier, L.R., Biard, D., Boussin, F.D., Dantzer, F., de Murcia,  
871 G., and Schreiber, V. (2009). Radiation-induced mitotic catastrophe in PARG-deficient  
872 cells. *J Cell Sci* 122, 1990-2002.



- 873 Bae, W., Park, J.H., Lee, M.H., Park, H.W., and Koo, H.S. (2019). Hypersensitivity to  
874 DNA double-strand breaks associated with PARG deficiency is suppressed by *exo-1* and  
875 *polq-1* mutations in *Caenorhabditis elegans*. *FEBS J*.
- 876 Barnes, T.M., Kohara, Y., Coulson, A., and Hekimi, S. (1995). Meiotic recombination,  
877 noncoding DNA and genomic organization in *Caenorhabditis elegans*. *Genetics* *141*,  
878 159-179.
- 879 Bhalla, N., Wynne, D.J., Jantsch, V., and Dernburg, A.F. (2008). ZHP-3 acts at  
880 crossovers to couple meiotic recombination with synaptonemal complex disassembly  
881 and bivalent formation in *C. elegans*. *PLoS Genet* *4*, e1000235.
- 882 Byrne, A.B., McWhirter, R.D., Sekine, Y., Strittmatter, S.M., Miller, D.M., and  
883 Hammarlund, M. (2016). Inhibiting poly(ADP-ribosylation) improves axon regeneration.  
884 *Elife* *5*.
- 885 Cao, L., Alani, E., and Kleckner, N. (1990). A pathway for generation and processing of  
886 double-strand breaks during meiotic recombination in *S. cerevisiae*. *Cell* *61*, 1089-1101.
- 887 Chin, G.M., and Villeneuve, A.M. (2001). *C. elegans mre-11* is required for meiotic  
888 recombination and DNA repair but is dispensable for the meiotic G(2) DNA damage  
889 checkpoint. *Genes Dev* *15*, 522-534.
- 890 Colaiacovo, M.P., MacQueen, A.J., Martinez-Perez, E., McDonald, K., Adamo, A., La  
891 Volpe, A., and Villeneuve, A.M. (2003). Synaptonemal complex assembly in *C. elegans*  
892 is dispensable for loading strand-exchange proteins but critical for proper completion of  
893 recombination. *Dev Cell* *5*, 463-474.
- 894 Crawley, O., Barroso, C., Testori, S., Ferrandiz, N., Silva, N., Castellano-Pozo, M., Jaso-  
895 Tamame, A.L., and Martinez-Perez, E. (2016). Cohesin-interacting protein WAPL-1  
896 regulates meiotic chromosome structure and cohesion by antagonizing specific cohesin  
897 complexes. *Elife* *5*, e10851.
- 898 Dantzer, F., Mark, M., Quenet, D., Scherthan, H., Huber, A., Liebe, B., Monaco, L.,  
899 Chicheportiche, A., Sassone-Corsi, P., de Murcia, G., *et al.* (2006). Poly(ADP-ribose)  
900 polymerase-2 contributes to the fidelity of male meiosis I and spermiogenesis. *Proc Natl*  
901 *Acad Sci U S A* *103*, 14854-14859.
- 902 de Carvalho, C.E., Zaaier, S., Smolikov, S., Gu, Y., Schumacher, J.M., and Colaiacovo,  
903 M.P. (2008). LAB-1 antagonizes the Aurora B kinase in *C. elegans*. *Genes Dev* *22*, 2869-  
904 2885.
- 905 de los Santos, T., Hunter, N., Lee, C., Larkin, B., Loidl, J., and Hollingsworth, N.M. (2003).  
906 The Mus81/Mms4 endonuclease acts independently of double-Holliday junction  
907 resolution to promote a distinct subset of crossovers during meiosis in budding yeast.  
908 *Genetics* *164*, 81-94.
- 909 Dequen, F., Gagnon, S.N., and Desnoyers, S. (2005). Ionizing radiations in  
910 *Caenorhabditis elegans* induce poly(ADP-ribosylation), a conserved DNA-damage  
911 response essential for survival. *DNA Repair (Amst)* *4*, 814-825.



- 912 Gagnon, S.N., Hengartner, M.O., and Desnoyers, S. (2002). The genes *pme-1* and *pme-*  
913 *2* encode two poly(ADP-ribose) polymerases in *Caenorhabditis elegans*. *Biochem J* *368*,  
914 263-271.
- 915 Gibson, B.A., and Kraus, W.L. (2012). New insights into the molecular and cellular  
916 functions of poly(ADP-ribose) and PARPs. *Nat Rev Mol Cell Biol* *13*, 411-424.
- 917 Goodyer, W., Kaitna, S., Couteau, F., Ward, J.D., Boulton, S.J., and Zetka, M. (2008).  
918 HTP-3 links DSB formation with homolog pairing and crossing over during *C. elegans*  
919 meiosis. *Dev Cell* *14*, 263-274.
- 920 Gupte, R., Liu, Z., and Kraus, W.L. (2017). PARPs and ADP-ribosylation: recent  
921 advances linking molecular functions to biological outcomes. *Genes Dev* *31*, 101-126.
- 922 Hayashi, M., Chin, G.M., and Villeneuve, A.M. (2007). *C. elegans* germ cells switch  
923 between distinct modes of double-strand break repair during meiotic prophase  
924 progression. *PLoS Genet* *3*, e191.
- 925 Hillers, K.J., and Villeneuve, A.M. (2003). Chromosome-wide control of meiotic crossing  
926 over in *C. elegans*. *Curr Biol* *13*, 1641-1647.
- 927 Hillers, K.J., and Villeneuve, A.M. (2009). Analysis of meiotic recombination in  
928 *Caenorhabditis elegans*. *Methods Mol Biol* *557*, 77-97.
- 929 Hodgkin, J., Horvitz, H.R., and Brenner, S. (1979). Nondisjunction Mutants of the  
930 Nematode CAENORHABDITIS ELEGANS. *Genetics* *91*, 67-94.
- 931 Jagut, M., Hamminger, P., Woglar, A., Millonigg, S., Paulin, L., Mikl, M., Dello Stritto,  
932 M.R., Tang, L., Habacher, C., Tam, A., *et al.* (2016). Separable Roles for a  
933 *Caenorhabditis elegans* RMI1 Homolog in Promoting and Antagonizing Meiotic  
934 Crossovers Ensure Faithful Chromosome Inheritance. *PLoS Biol* *14*, e1002412.
- 935 Janisiw, E., Dello Stritto, M.R., Jantsch, V., and Silva, N. (2018). BRCA1-BARD1  
936 associate with the synaptonemal complex and pro-crossover factors and influence RAD-  
937 51 dynamics during *Caenorhabditis elegans* meiosis. *PLoS Genet* *14*, e1007653.
- 938 Jantsch, V., Pasierbek, P., Mueller, M.M., Schweizer, D., Jantsch, M., and Loidl, J.  
939 (2004). Targeted gene knockout reveals a role in meiotic recombination for ZHP-3, a  
940 Zip3-related protein in *Caenorhabditis elegans*. *Mol Cell Biol* *24*, 7998-8006.
- 941 Johzuka, K., and Ogawa, H. (1995). Interaction of Mre11 and Rad50: two proteins  
942 required for DNA repair and meiosis-specific double-strand break formation in  
943 *Saccharomyces cerevisiae*. *Genetics* *139*, 1521-1532.
- 944 Kaufmann, T., Grishkovskaya, I., Polyansky, A.A., Kostrhon, S., Kukulj, E., Olek, K.M.,  
945 Herbert, S., Beltzung, E., Mechtler, K., Peterbauer, T., *et al.* (2017). A novel non-  
946 canonical PIP-box mediates PARG interaction with PCNA. *Nucleic Acids Res* *45*, 9741-  
947 9759.
- 948 Keeney, S., Giroux, C.N., and Kleckner, N. (1997). Meiosis-specific DNA double-strand  
949 breaks are catalyzed by Spo11, a member of a widely conserved protein family. *Cell* *88*,  
950 375-384.

- 951 Kelly, K.O., Dernburg, A.F., Stanfield, G.M., and Villeneuve, A.M. (2000). *Caenorhabditis*  
952 *elegans* *msh-5* is required for both normal and radiation-induced meiotic crossing over  
953 but not for completion of meiosis. *Genetics* 156, 617-630.
- 954 Kleckner, N. (2006). Chiasma formation: chromatin/axis interplay and the role(s) of the  
955 synaptonemal complex. *Chromosoma* 115, 175-194.
- 956 Koh, D.W., Lawler, A.M., Poitras, M.F., Sasaki, M., Wattler, S., Nehls, M.C., Stoger, T.,  
957 Poirier, G.G., Dawson, V.L., and Dawson, T.M. (2004). Failure to degrade poly(ADP-  
958 ribose) causes increased sensitivity to cytotoxicity and early embryonic lethality. *Proc*  
959 *Natl Acad Sci U S A* 101, 17699-17704.
- 960 Li, Q., Saito, T.T., Martinez-Garcia, M., Deshong, A.J., Nadarajan, S., Lawrence, K.S.,  
961 Checchi, P.M., Colaiacovo, M.P., and Engebrecht, J. (2018). The tumor suppressor  
962 BRCA1-BARD1 complex localizes to the synaptonemal complex and regulates  
963 recombination under meiotic dysfunction in *Caenorhabditis elegans*. *PLoS Genet* 14,  
964 e1007701.
- 965 Libuda, D.E., Uzawa, S., Meyer, B.J., and Villeneuve, A.M. (2013). Meiotic chromosome  
966 structures constrain and respond to designation of crossover sites. *Nature* 502, 703-706.
- 967 Lim, J.G., Stine, R.R., and Yanowitz, J.L. (2008). Domain-specific regulation of  
968 recombination in *Caenorhabditis elegans* in response to temperature, age and sex.  
969 *Genetics* 180, 715-726.
- 970 Link, J., Paouneskou, D., Velkova, M., Daryabeigi, A., Laos, T., Labella, S., Barroso, C.,  
971 Pacheco Pinol, S., Montoya, A., Kramer, H., *et al.* (2018). Transient and Partial Nuclear  
972 Lamina Disruption Promotes Chromosome Movement in Early Meiotic Prophase. *Dev*  
973 *Cell* 45, 212-225 e217.
- 974 Macaisne, N., Kessler, Z., and Yanowitz, J.L. (2018). Meiotic Double-Strand Break  
975 Proteins Influence Repair Pathway Utilization. *Genetics* 210, 843-856.
- 976 Machovina, T.S., Mainpal, R., Daryabeigi, A., McGovern, O., Paouneskou, D., Labella,  
977 S., Zetka, M., Jantsch, V., and Yanowitz, J.L. (2016). A Surveillance System Ensures  
978 Crossover Formation in *C. elegans*. *Curr Biol* 26, 2873-2884.
- 979 MacQueen, A.J., Colaiacovo, M.P., McDonald, K., and Villeneuve, A.M. (2002).  
980 Synapsis-dependent and -independent mechanisms stabilize homolog pairing during  
981 meiotic prophase in *C. elegans*. *Genes Dev* 16, 2428-2442.
- 982 Martinez-Perez, E., Schvarzstein, M., Barroso, C., Lightfoot, J., Dernburg, A.F., and  
983 Villeneuve, A.M. (2008). Crossovers trigger a remodeling of meiotic chromosome axis  
984 composition that is linked to two-step loss of sister chromatid cohesion. *Genes Dev* 22,  
985 2886-2901.
- 986 Martinez-Perez, E., and Villeneuve, A.M. (2005). HTP-1-dependent constraints  
987 coordinate homolog pairing and synapsis and promote chiasma formation during *C.*  
988 *elegans* meiosis. *Genes Dev* 19, 2727-2743.

- 989 Mateo, A.R., Kessler, Z., Jolliffe, A.K., McGovern, O., Yu, B., Nicolucci, A., Yanowitz,  
990 J.L., and Derry, W.B. (2016). The p53-like Protein CEP-1 Is Required for Meiotic Fidelity  
991 in *C. elegans*. *Curr Biol* 26, 1148-1158.
- 992 Meneely, P.M., McGovern, O.L., Heinis, F.I., and Yanowitz, J.L. (2012). Crossover  
993 distribution and frequency are regulated by him-5 in *Caenorhabditis elegans*. *Genetics*  
994 190, 1251-1266.
- 995 Menissier de Murcia, J., Ricoul, M., Tartier, L., Niedergang, C., Huber, A., Dantzer, F.,  
996 Schreiber, V., Ame, J.C., Dierich, A., LeMeur, M., *et al.* (2003). Functional interaction  
997 between PARP-1 and PARP-2 in chromosome stability and embryonic development in  
998 mouse. *EMBO J* 22, 2255-2263.
- 999 Meyer-Ficca, M.L., Meyer, R.G., Coyle, D.L., Jacobson, E.L., and Jacobson, M.K. (2004).  
1000 Human poly(ADP-ribose) glycohydrolase is expressed in alternative splice variants  
1001 yielding isoforms that localize to different cell compartments. *Exp Cell Res* 297, 521-532.
- 1002 Mortusewicz, O., Fouquerel, E., Ame, J.C., Leonhardt, H., and Schreiber, V. (2011).  
1003 PARG is recruited to DNA damage sites through poly(ADP-ribose)- and PCNA-  
1004 dependent mechanisms. *Nucleic Acids Res* 39, 5045-5056.
- 1005 O'Sullivan, J., Tedim Ferreira, M., Gagne, J.P., Sharma, A.K., Hendzel, M.J., Masson,  
1006 J.Y., and Poirier, G.G. (2019). Emerging roles of eraser enzymes in the dynamic control  
1007 of protein ADP-ribosylation. *Nat Commun* 10, 1182.
- 1008 Ohashi, S., Kanai, M., Hanai, S., Uchiumi, F., Maruta, H., Tanuma, S., and Miwa, M.  
1009 (2003). Subcellular localization of poly(ADP-ribose) glycohydrolase in mammalian cells.  
1010 *Biochem Biophys Res Commun* 307, 915-921.
- 1011 Paix, A., Folkmann, A., Rasoloson, D., and Seydoux, G. (2015). High Efficiency,  
1012 Homology-Directed Genome Editing in *Caenorhabditis elegans* Using CRISPR-Cas9  
1013 Ribonucleoprotein Complexes. *Genetics* 201, 47-54.
- 1014 Pasierbek, P., Jantsch, M., Melcher, M., Schleiffer, A., Schweizer, D., and Loidl, J.  
1015 (2001). A *Caenorhabditis elegans* cohesion protein with functions in meiotic chromosome  
1016 pairing and disjunction. *Genes Dev* 15, 1349-1360.
- 1017 Patel, C.N., Koh, D.W., Jacobson, M.K., and Oliveira, M.A. (2005). Identification of three  
1018 critical acidic residues of poly(ADP-ribose) glycohydrolase involved in catalysis:  
1019 determining the PARG catalytic domain. *Biochem J* 388, 493-500.
- 1020 Pattabiraman, D., Roelens, B., Woglar, A., and Villeneuve, A.M. (2017). Meiotic  
1021 recombination modulates the structure and dynamics of the synaptonemal complex  
1022 during *C. elegans* meiosis. *PLoS Genet* 13, e1006670.
- 1023 Penkner, A., Portik-Dobos, Z., Tang, L., Schnabel, R., Novatchkova, M., Jantsch, V., and  
1024 Loidl, J. (2007). A conserved function for a *Caenorhabditis elegans* Com1/Sae2/CtIP  
1025 protein homolog in meiotic recombination. *EMBO J* 26, 5071-5082.
- 1026 Penkner, A.M., Fridkin, A., Gloggnitzer, J., Baudrimont, A., Machacek, T., Woglar, A.,  
1027 Csaszar, E., Pasierbek, P., Ammerer, G., Gruenbaum, Y., *et al.* (2009). Meiotic

- 1028 chromosome homology search involves modifications of the nuclear envelope protein  
1029 Matefin/SUN-1. *Cell* 139, 920-933.
- 1030 Ray Chaudhuri, A., and Nussenzweig, A. (2017). The multifaceted roles of PARP1 in  
1031 DNA repair and chromatin remodelling. *Nat Rev Mol Cell Biol* 18, 610-621.
- 1032 Reddy, K.C., and Villeneuve, A.M. (2004). *C. elegans* HIM-17 links chromatin  
1033 modification and competence for initiation of meiotic recombination. *Cell* 118, 439-452.
- 1034 Reichman, R., Shi, Z., Malone, R., and Smolikove, S. (2018). Mitotic and Meiotic  
1035 Functions for the SUMOylation Pathway in the *Caenorhabditis elegans* Germline.  
1036 *Genetics* 208, 1421-1441.
- 1037 Reuben, M., and Lin, R. (2002). Germline X chromosomes exhibit contrasting patterns  
1038 of histone H3 methylation in *Caenorhabditis elegans*. *Dev Biol* 245, 71-82.
- 1039 Rog, O., and Dernburg, A.F. (2015). Direct Visualization Reveals Kinetics of Meiotic  
1040 Chromosome Synapsis. *Cell Rep*.
- 1041 Rosu, S., Libuda, D.E., and Villeneuve, A.M. (2011). Robust crossover assurance and  
1042 regulated interhomolog access maintain meiotic crossover number. *Science* 334, 1286-  
1043 1289.
- 1044 Rosu, S., Zawadzki, K.A., Stamper, E.L., Libuda, D.E., Reese, A.L., Dernburg, A.F., and  
1045 Villeneuve, A.M. (2013). The *C. elegans* DSB-2 protein reveals a regulatory network that  
1046 controls competence for meiotic DSB formation and promotes crossover assurance.  
1047 *PLoS Genet* 9, e1003674.
- 1048 Saito, T.T., Lui, D.Y., Kim, H.M., Meyer, K., and Colaiacovo, M.P. (2013). Interplay  
1049 between structure-specific endonucleases for crossover control during *Caenorhabditis*  
1050 *elegans* meiosis. *PLoS Genet* 9, e1003586.
- 1051 Saito, T.T., Youds, J.L., Boulton, S.J., and Colaiacovo, M.P. (2009). *Caenorhabditis*  
1052 *elegans* HIM-18/SLX-4 interacts with SLX-1 and XPF-1 and maintains genomic integrity  
1053 in the germline by processing recombination intermediates. *PLoS Genet* 5, e1000735.
- 1054 Serrentino, M.E., and Borde, V. (2012). The spatial regulation of meiotic recombination  
1055 hotspots: are all DSB hotspots crossover hotspots? *Exp Cell Res* 318, 1347-1352.
- 1056 Silva, N., Ferrandiz, N., Barroso, C., Tognetti, S., Lightfoot, J., Telecan, O., Encheva, V.,  
1057 Faull, P., Hanni, S., Furger, A., *et al.* (2014). The fidelity of synaptonemal complex  
1058 assembly is regulated by a signaling mechanism that controls early meiotic progression.  
1059 *Dev Cell* 31, 503-511.
- 1060 Slade, D. (2019). Mitotic functions of poly(ADP-ribose) polymerases. *Biochem*  
1061 *Pharmacol*.
- 1062 Smolikov, S., Eizinger, A., Schild-Prufert, K., Hurlburt, A., McDonald, K., Engebrecht, J.,  
1063 Villeneuve, A.M., and Colaiacovo, M.P. (2007). SYP-3 restricts synaptonemal complex  
1064 assembly to bridge paired chromosome axes during meiosis in *Caenorhabditis elegans*.  
1065 *Genetics* 176, 2015-2025.

- 1066 St-Laurent, J.F., Gagnon, S.N., Dequen, F., Hardy, I., and Desnoyers, S. (2007). Altered  
1067 DNA damage response in *Caenorhabditis elegans* with impaired poly(ADP-ribose)  
1068 glycohydrolases genes expression. *DNA Repair (Amst)* 6, 329-343.
- 1069 Stamper, E.L., Rodenbusch, S.E., Rosu, S., Ahringer, J., Villeneuve, A.M., and Dernburg,  
1070 A.F. (2013). Identification of DSB-1, a protein required for initiation of meiotic  
1071 recombination in *Caenorhabditis elegans*, illuminates a crossover assurance checkpoint.  
1072 *PLoS Genet* 9, e1003679.
- 1073 Sun, H., Treco, D., Schultes, N.P., and Szostak, J.W. (1989). Double-strand breaks at  
1074 an initiation site for meiotic gene conversion. *Nature* 338, 87-90.
- 1075 Tsai, C.J., Mets, D.G., Albrecht, M.R., Nix, P., Chan, A., and Meyer, B.J. (2008). Meiotic  
1076 crossover number and distribution are regulated by a dosage compensation protein that  
1077 resembles a condensin subunit. *Genes Dev* 22, 194-211.
- 1078 Wagner, C.R., Kuervers, L., Baillie, D.L., and Yanowitz, J.L. (2010). *xnd-1* regulates the  
1079 global recombination landscape in *Caenorhabditis elegans*. *Nature* 467, 839-843.
- 1080 Weaver, A.N., and Yang, E.S. (2013). Beyond DNA Repair: Additional Functions of  
1081 PARP-1 in Cancer. *Front Oncol* 3, 290.
- 1082 Winstall, E., Affar, E.B., Shah, R., Bourassa, S., Scovassi, I.A., and Poirier, G.G. (1999).  
1083 Preferential perinuclear localization of poly(ADP-ribose) glycohydrolase. *Exp Cell Res*  
1084 251, 372-378.
- 1085 Woglar, A., Daryabeigi, A., Adamo, A., Habacher, C., Machacek, T., La Volpe, A., and  
1086 Jantsch, V. (2013). Matefin/SUN-1 phosphorylation is part of a surveillance mechanism  
1087 to coordinate chromosome synapsis and recombination with meiotic progression and  
1088 chromosome movement. *PLoS Genet* 9, e1003335.
- 1089 Yin, Y., and Smolikove, S. (2013). Impaired resection of meiotic double-strand breaks  
1090 channels repair to nonhomologous end joining in *Caenorhabditis elegans*. *Mol Cell Biol*  
1091 33, 2732-2747.
- 1092 Yokoo, R., Zawadzki, K.A., Nabeshima, K., Drake, M., Arur, S., and Villeneuve, A.M.  
1093 (2012). COSA-1 reveals robust homeostasis and separable licensing and reinforcement  
1094 steps governing meiotic crossovers. *Cell* 149, 75-87.
- 1095 Youds, J.L., Mets, D.G., McIlwraith, M.J., Martin, J.S., Ward, J.D., NJ, O.N., Rose, A.M.,  
1096 West, S.C., Meyer, B.J., and Boulton, S.J. (2010). RTEL-1 enforces meiotic crossover  
1097 interference and homeostasis. *Science* 327, 1254-1258.
- 1098 Zalevsky, J., MacQueen, A.J., Duffy, J.B., Kempfues, K.J., and Villeneuve, A.M. (1999).  
1099 Crossing over during *Caenorhabditis elegans* meiosis requires a conserved MutS-based  
1100 pathway that is partially dispensable in budding yeast. *Genetics* 153, 1271-1283.
- 1101 Zetka, M.C., Kawasaki, I., Strome, S., and Muller, F. (1999). Synapsis and chiasma  
1102 formation in *Caenorhabditis elegans* require HIM-3, a meiotic chromosome core  
1103 component that functions in chromosome segregation. *Genes Dev* 13, 2258-2270.

1104 Zickler, D., and Kleckner, N. (1999). Meiotic chromosomes: integrating structure and  
1105 function. *Annu Rev Genet* 33, 603-754.

1106 Zickler, D., and Kleckner, N. (2015). Recombination, Pairing, and Synapsis of Homologs  
1107 during Meiosis. *Cold Spring Harb Perspect Biol* 7.  
1108

1109

1110

1111

1112

1113



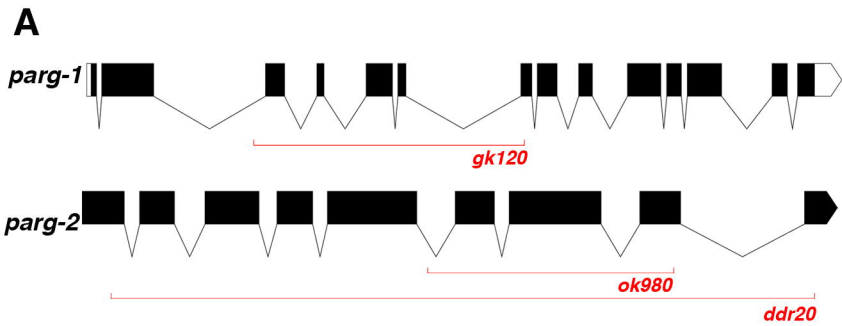

**B**

| Genotype                                     | Brood-size | Embryonic Lethality | Male Progeny |
|----------------------------------------------|------------|---------------------|--------------|
| WT                                           | 240        | 0.5%                | 0%           |
| <i>parg-1::GFP</i>                           | 278        | 0.14%               | 0%           |
| <i>parg-1(gk120)</i>                         | 240        | 3.9%                | 4.5%         |
| <i>parg-2(ddr20)</i>                         | 261        | 0.3%                | 0%           |
| <i>parg-1(gk120)</i><br><i>parg-2(ddr20)</i> | 254        | 2.8%                | 3.8%         |

**D**

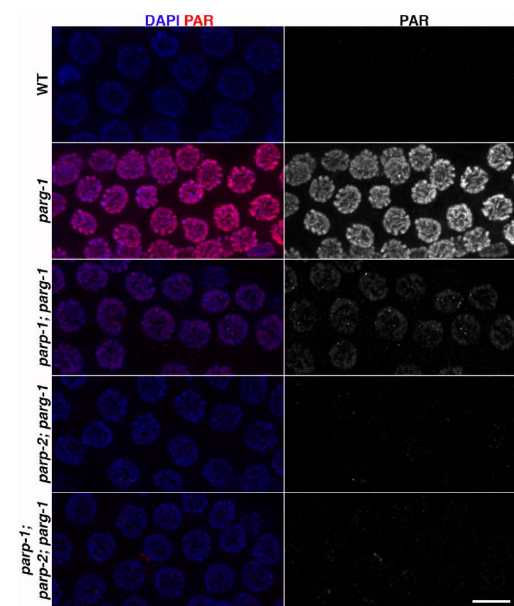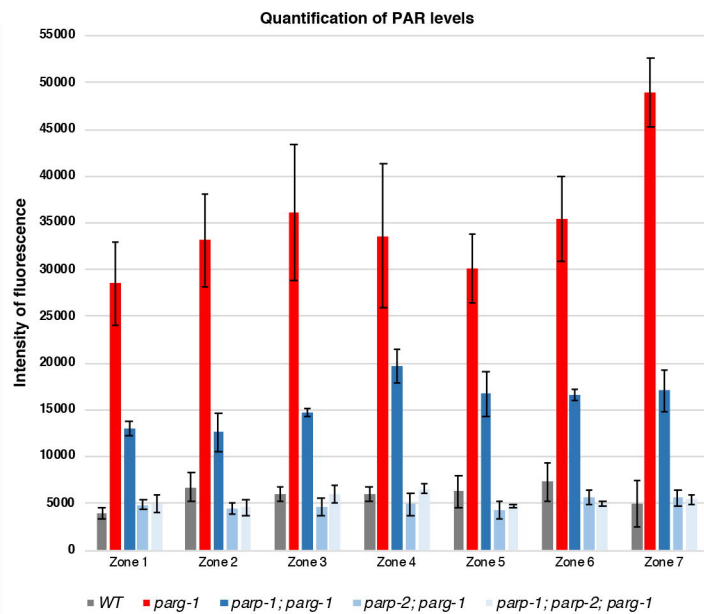

**C**

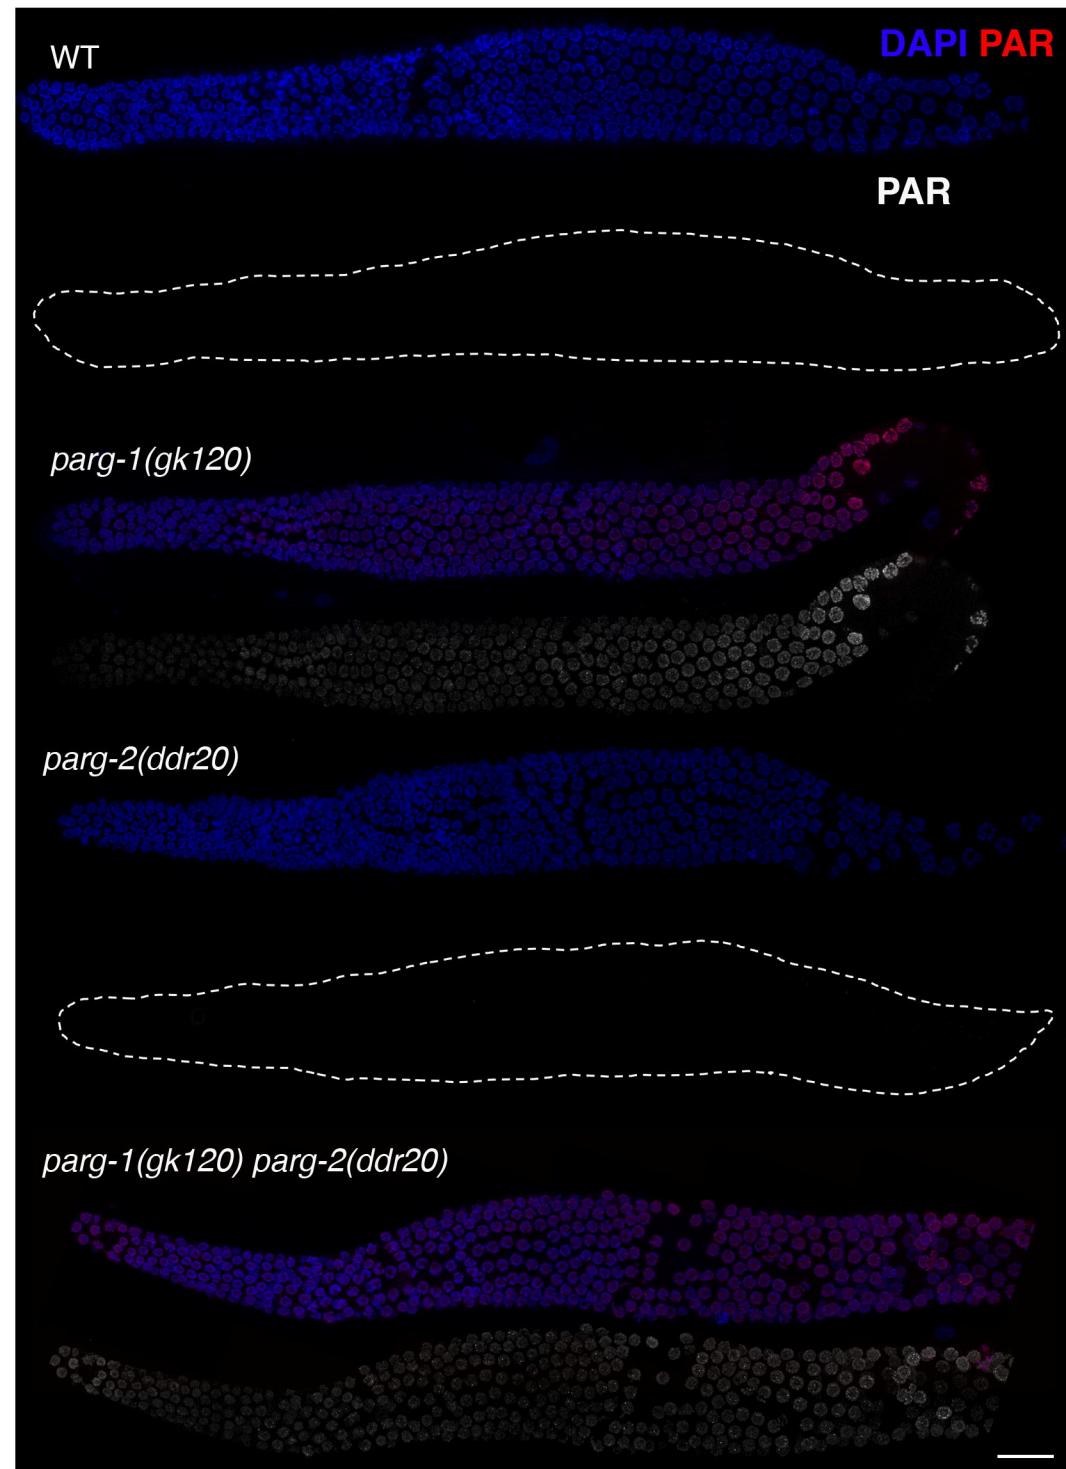



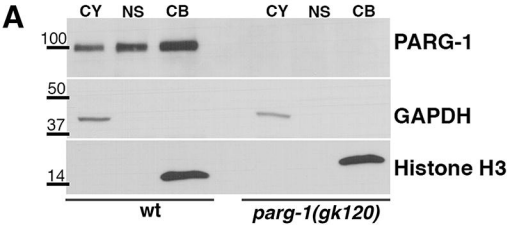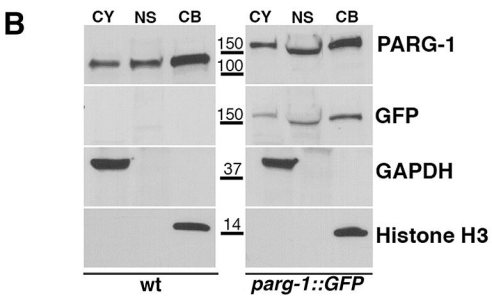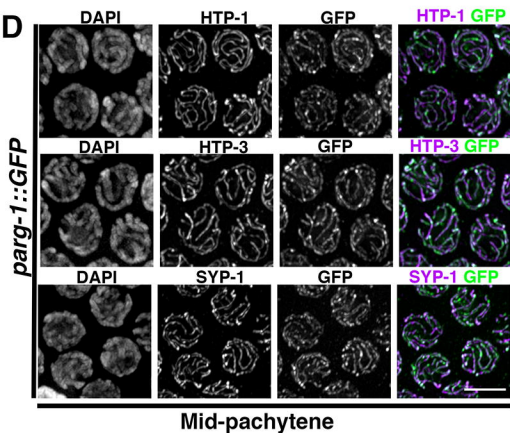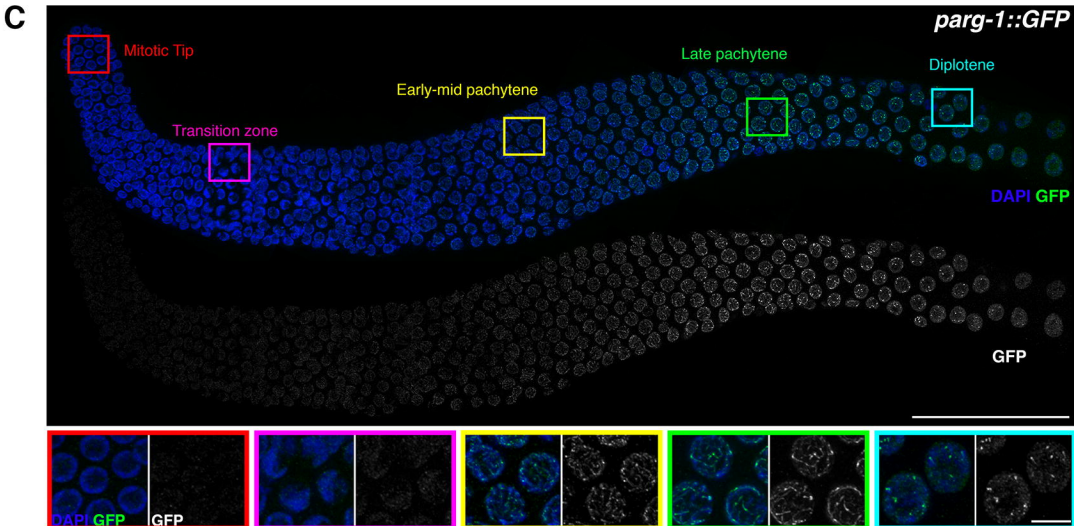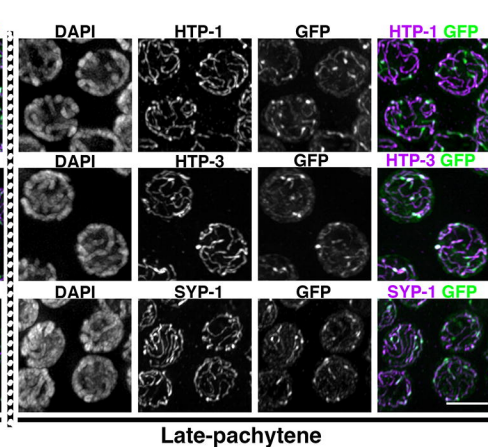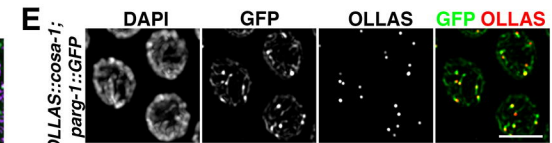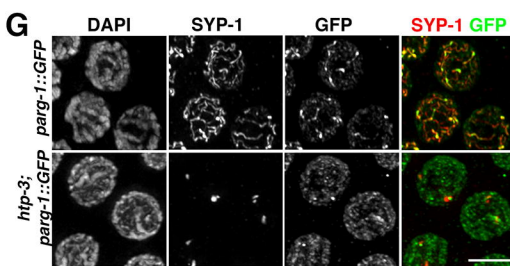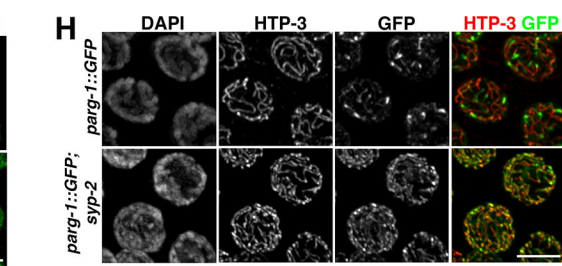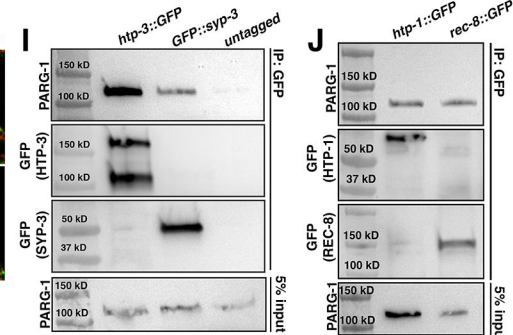

**A****RAD-51 foci quantification**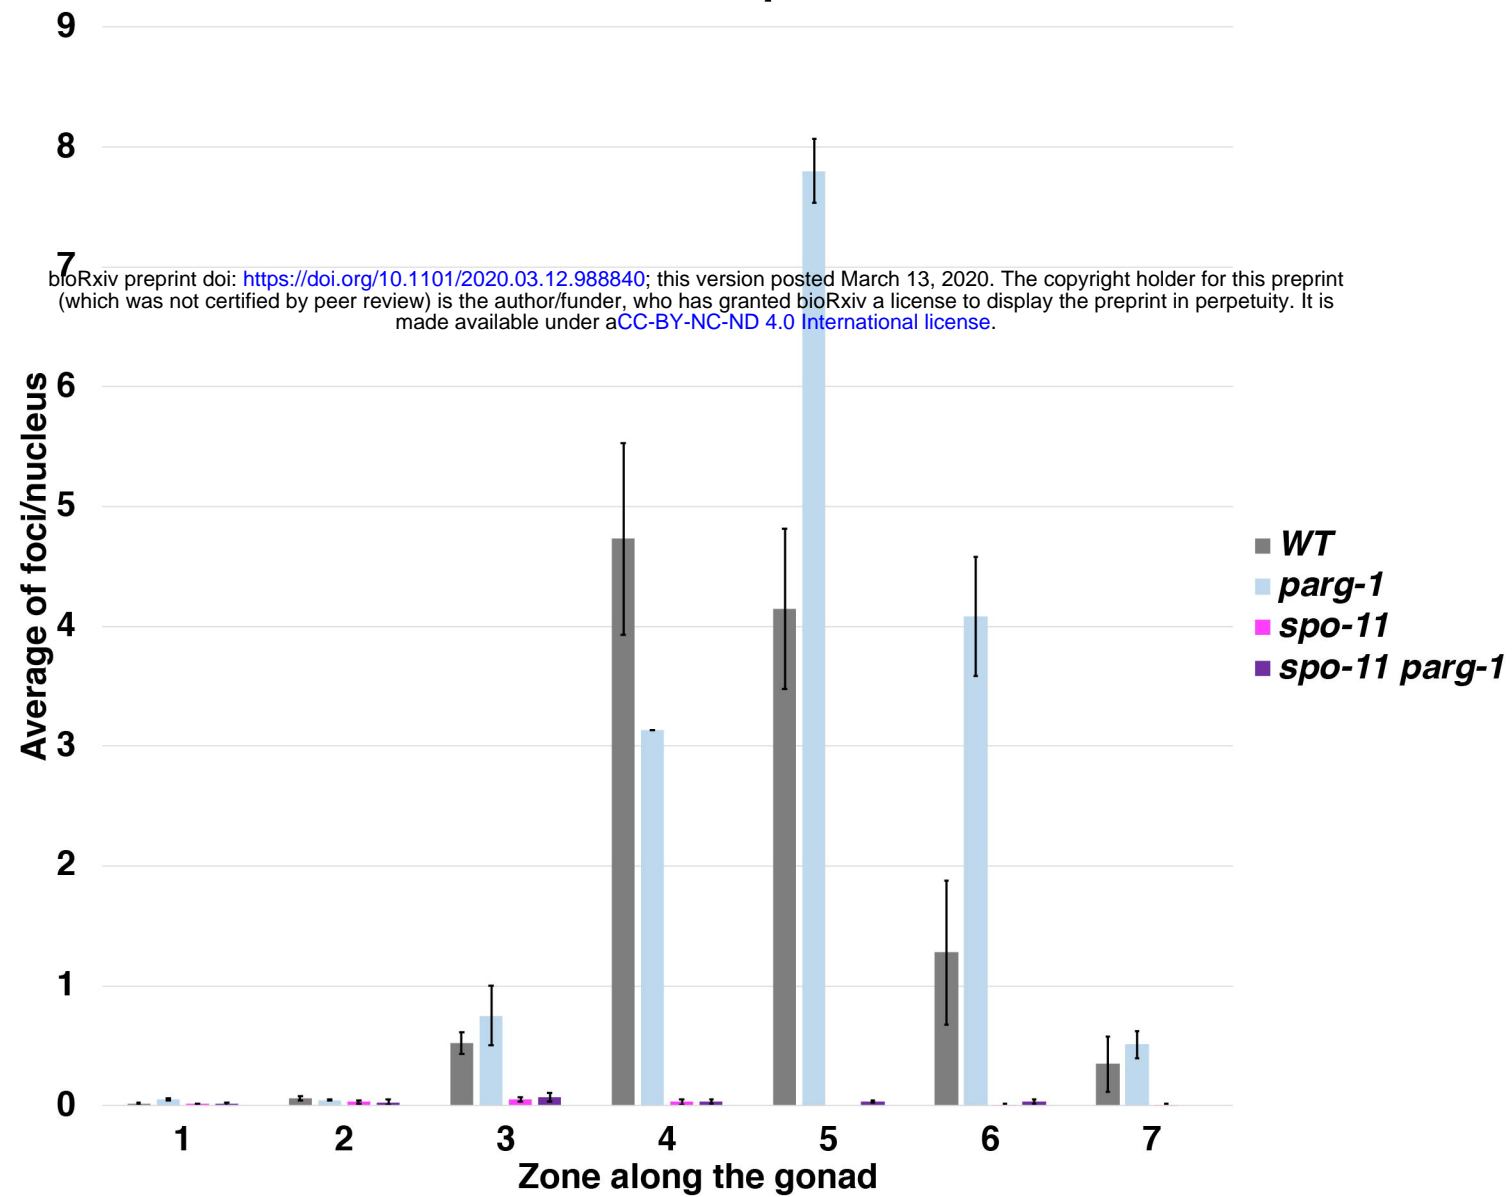**B**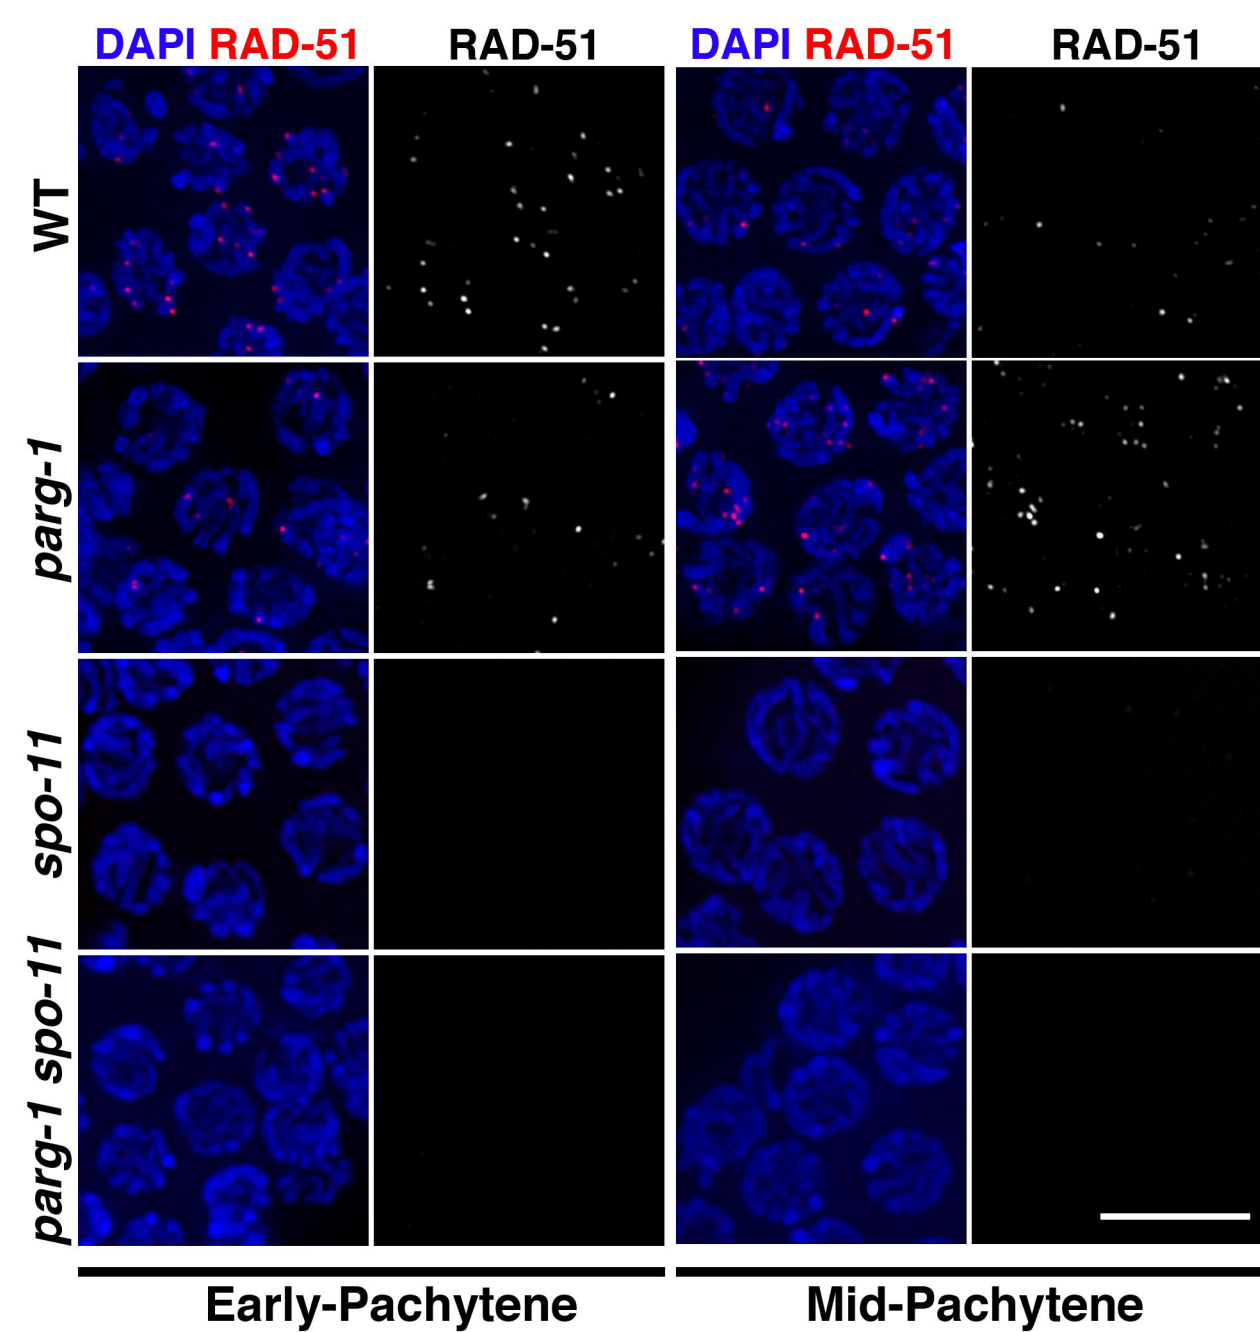**C****Quantification of DAPI bodies in diakinesis nuclei**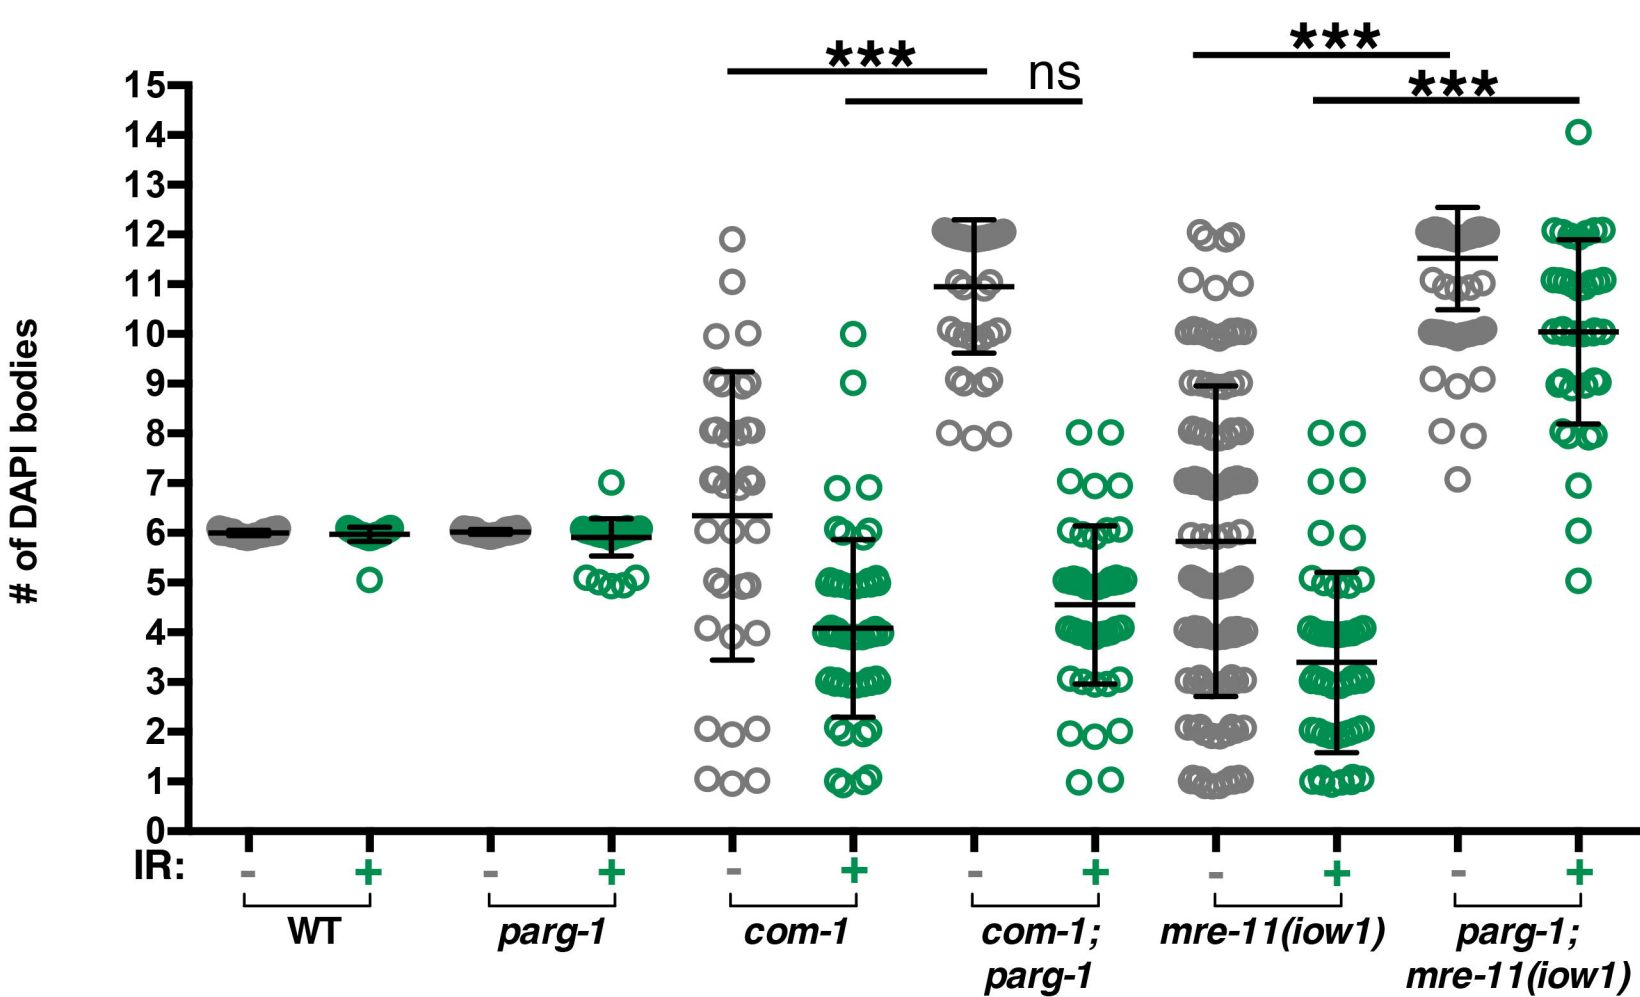**D**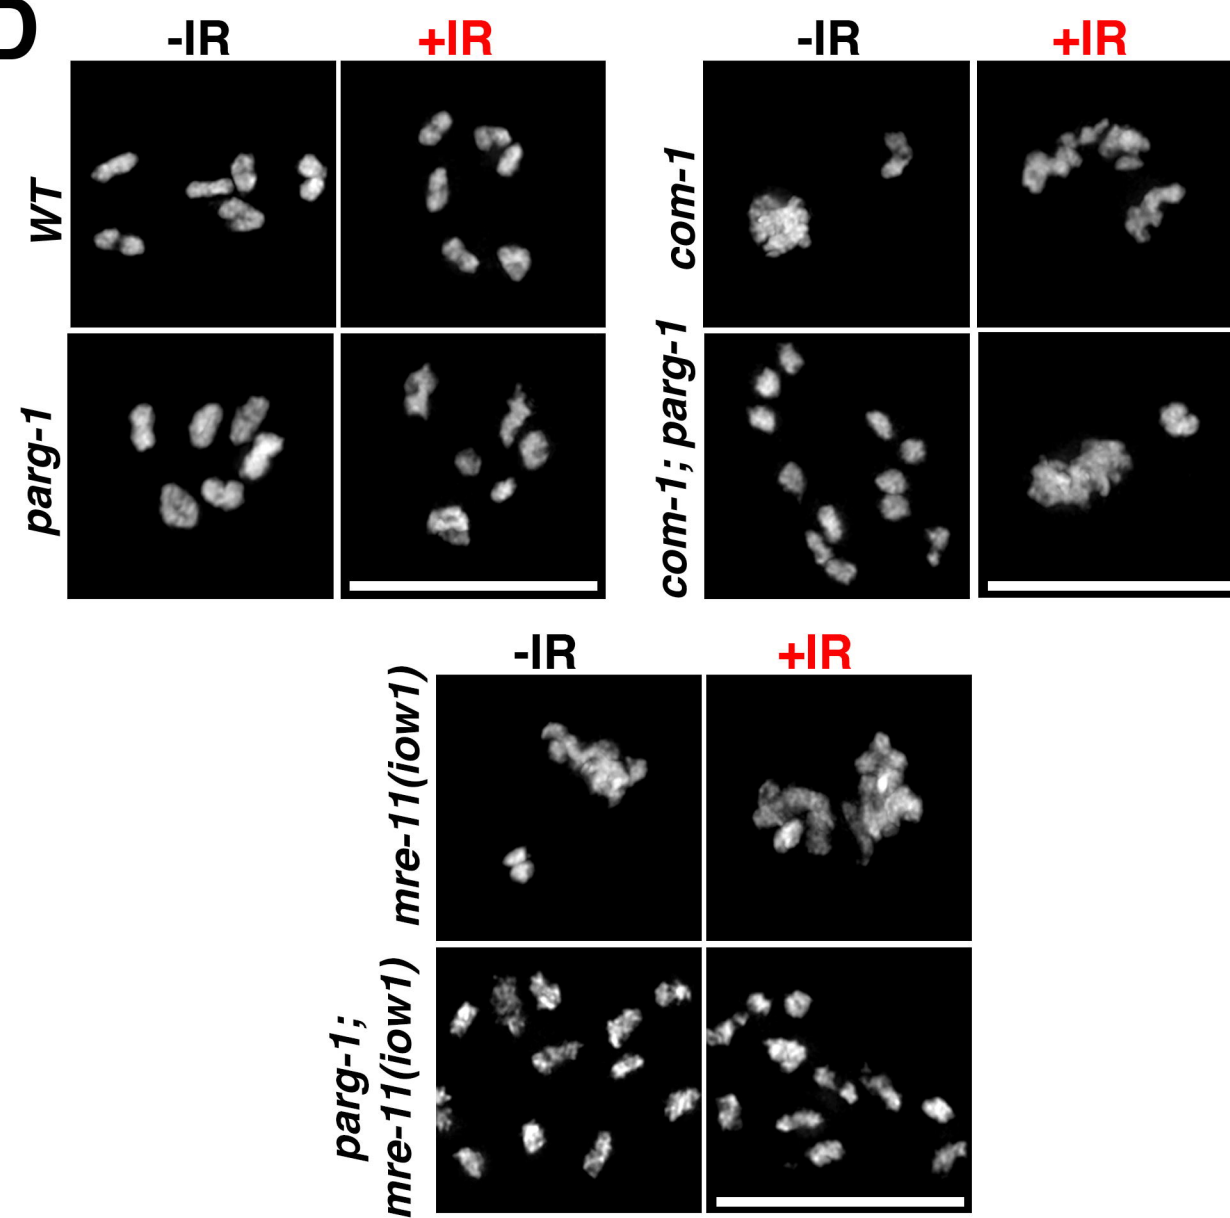



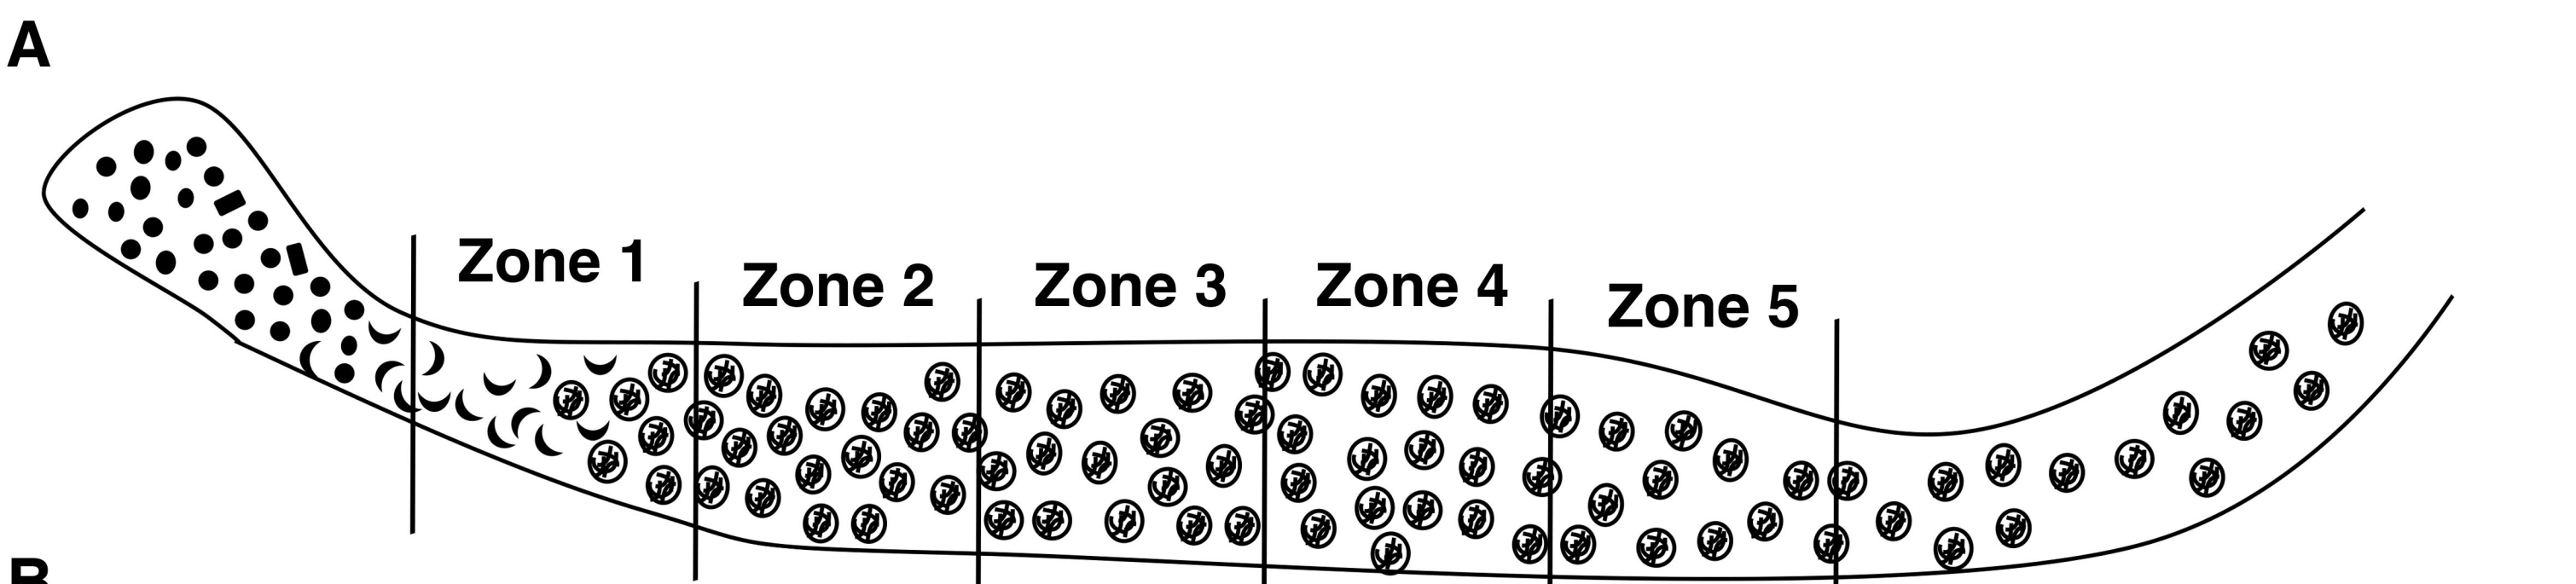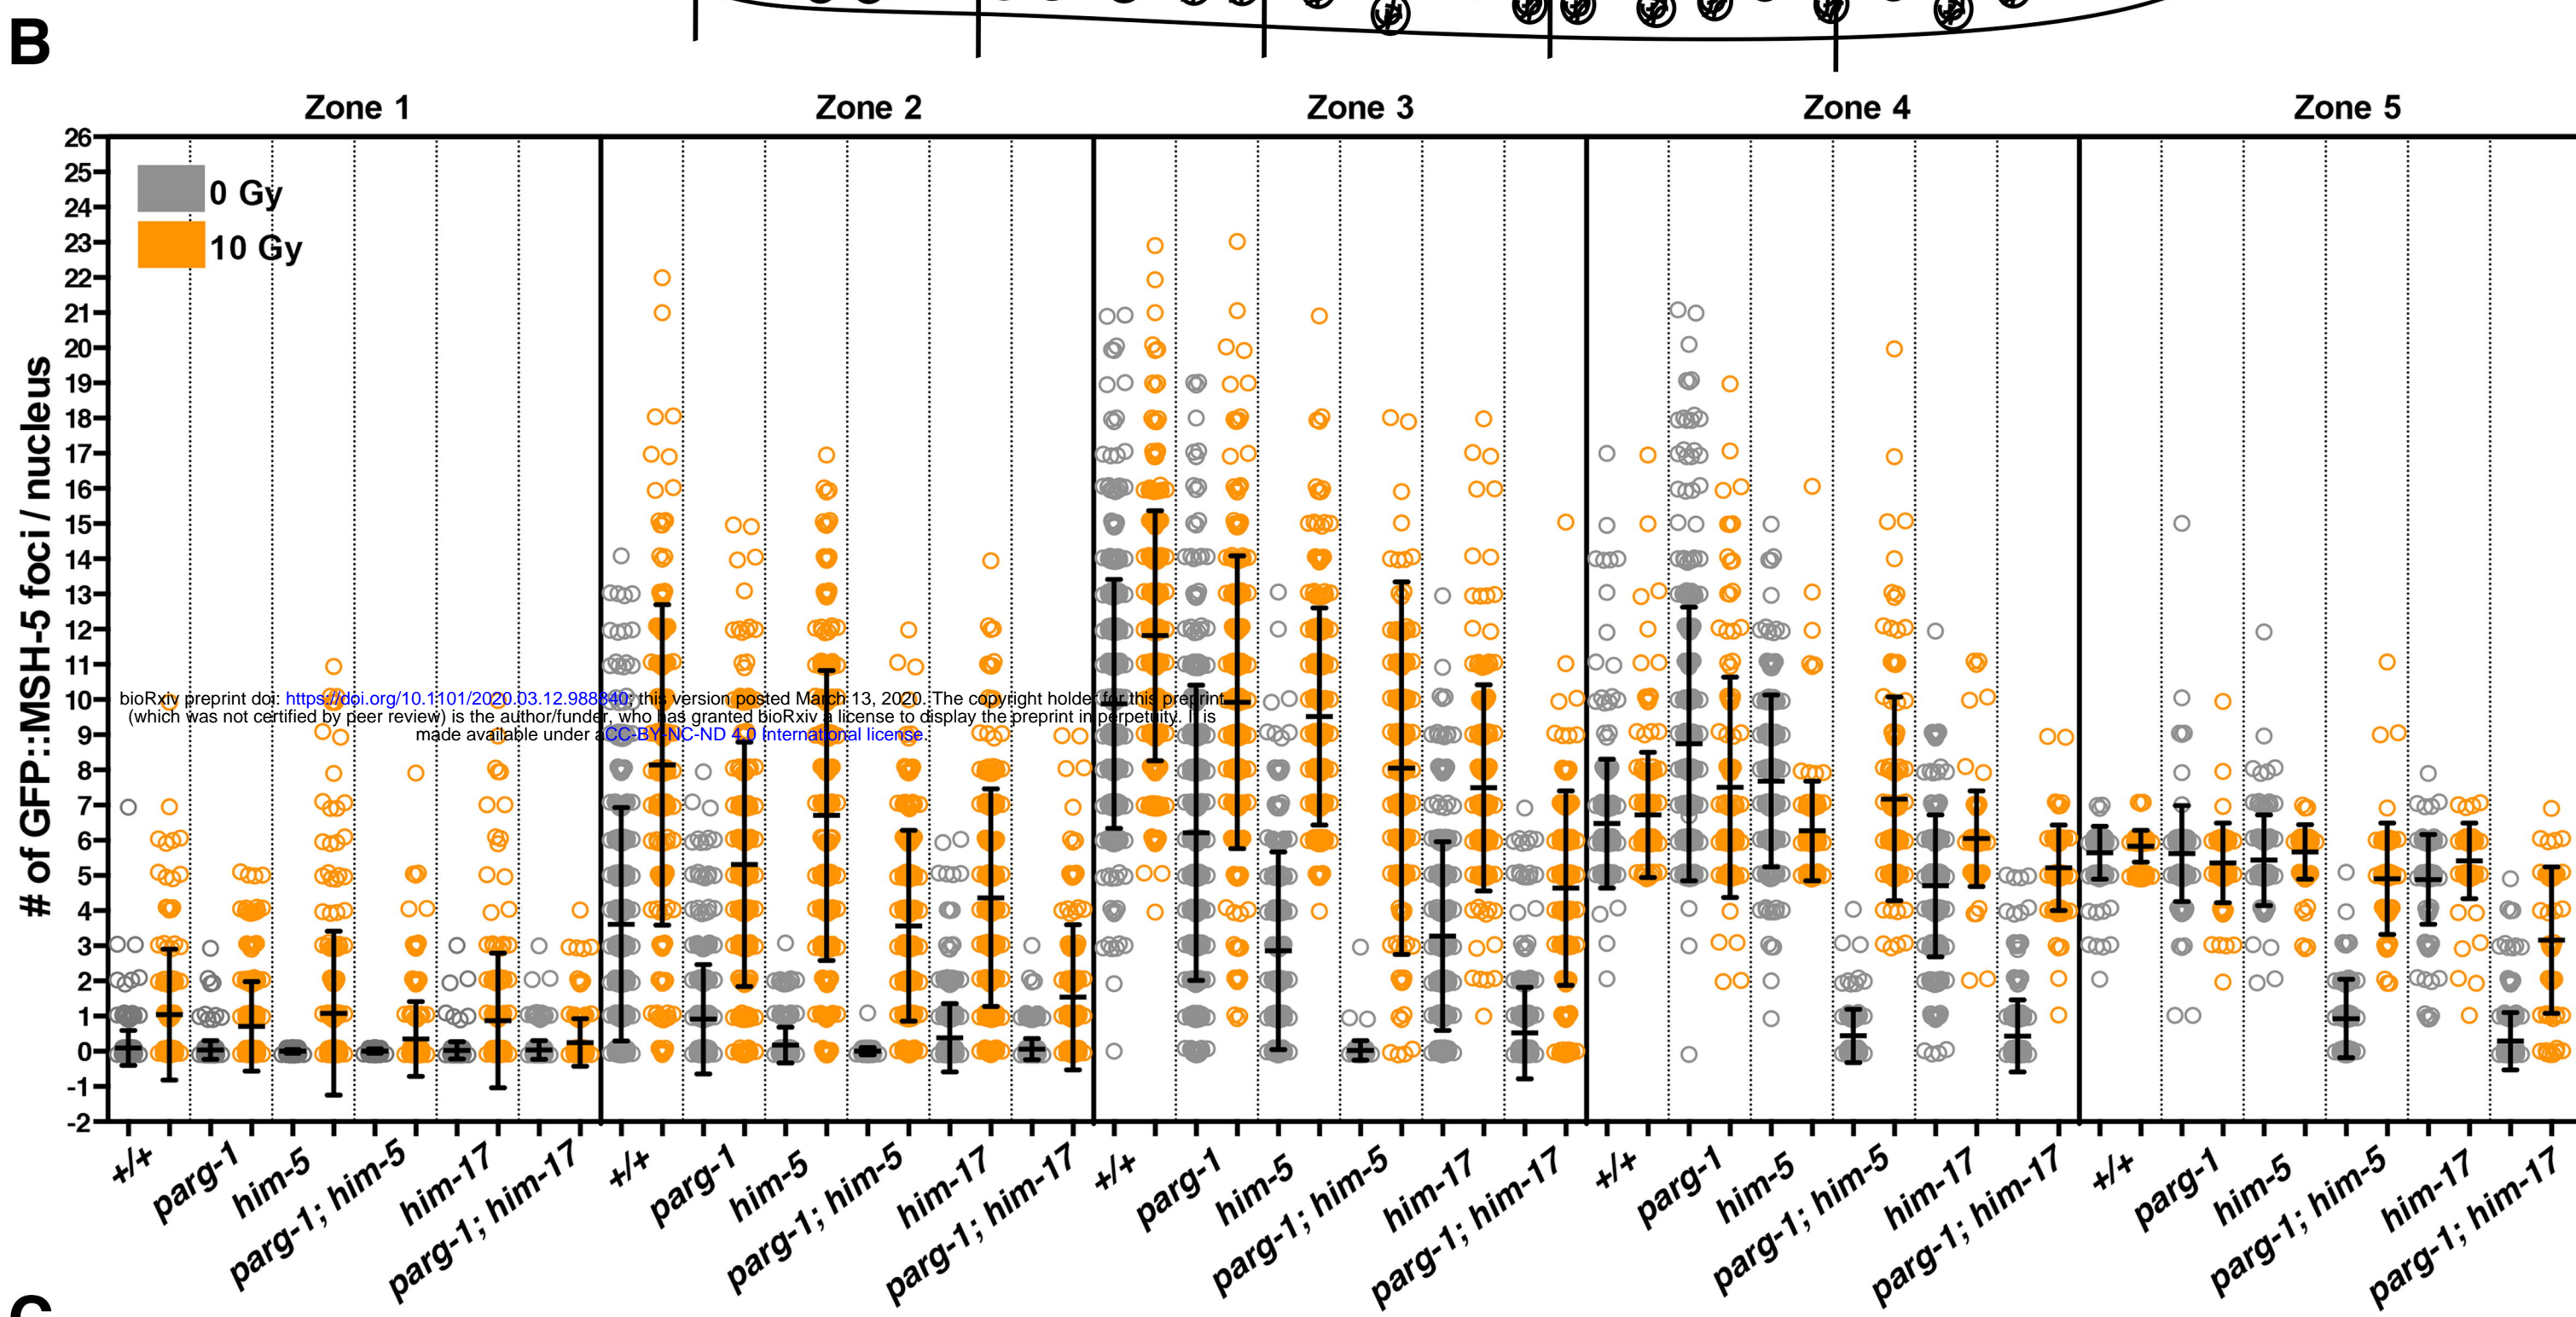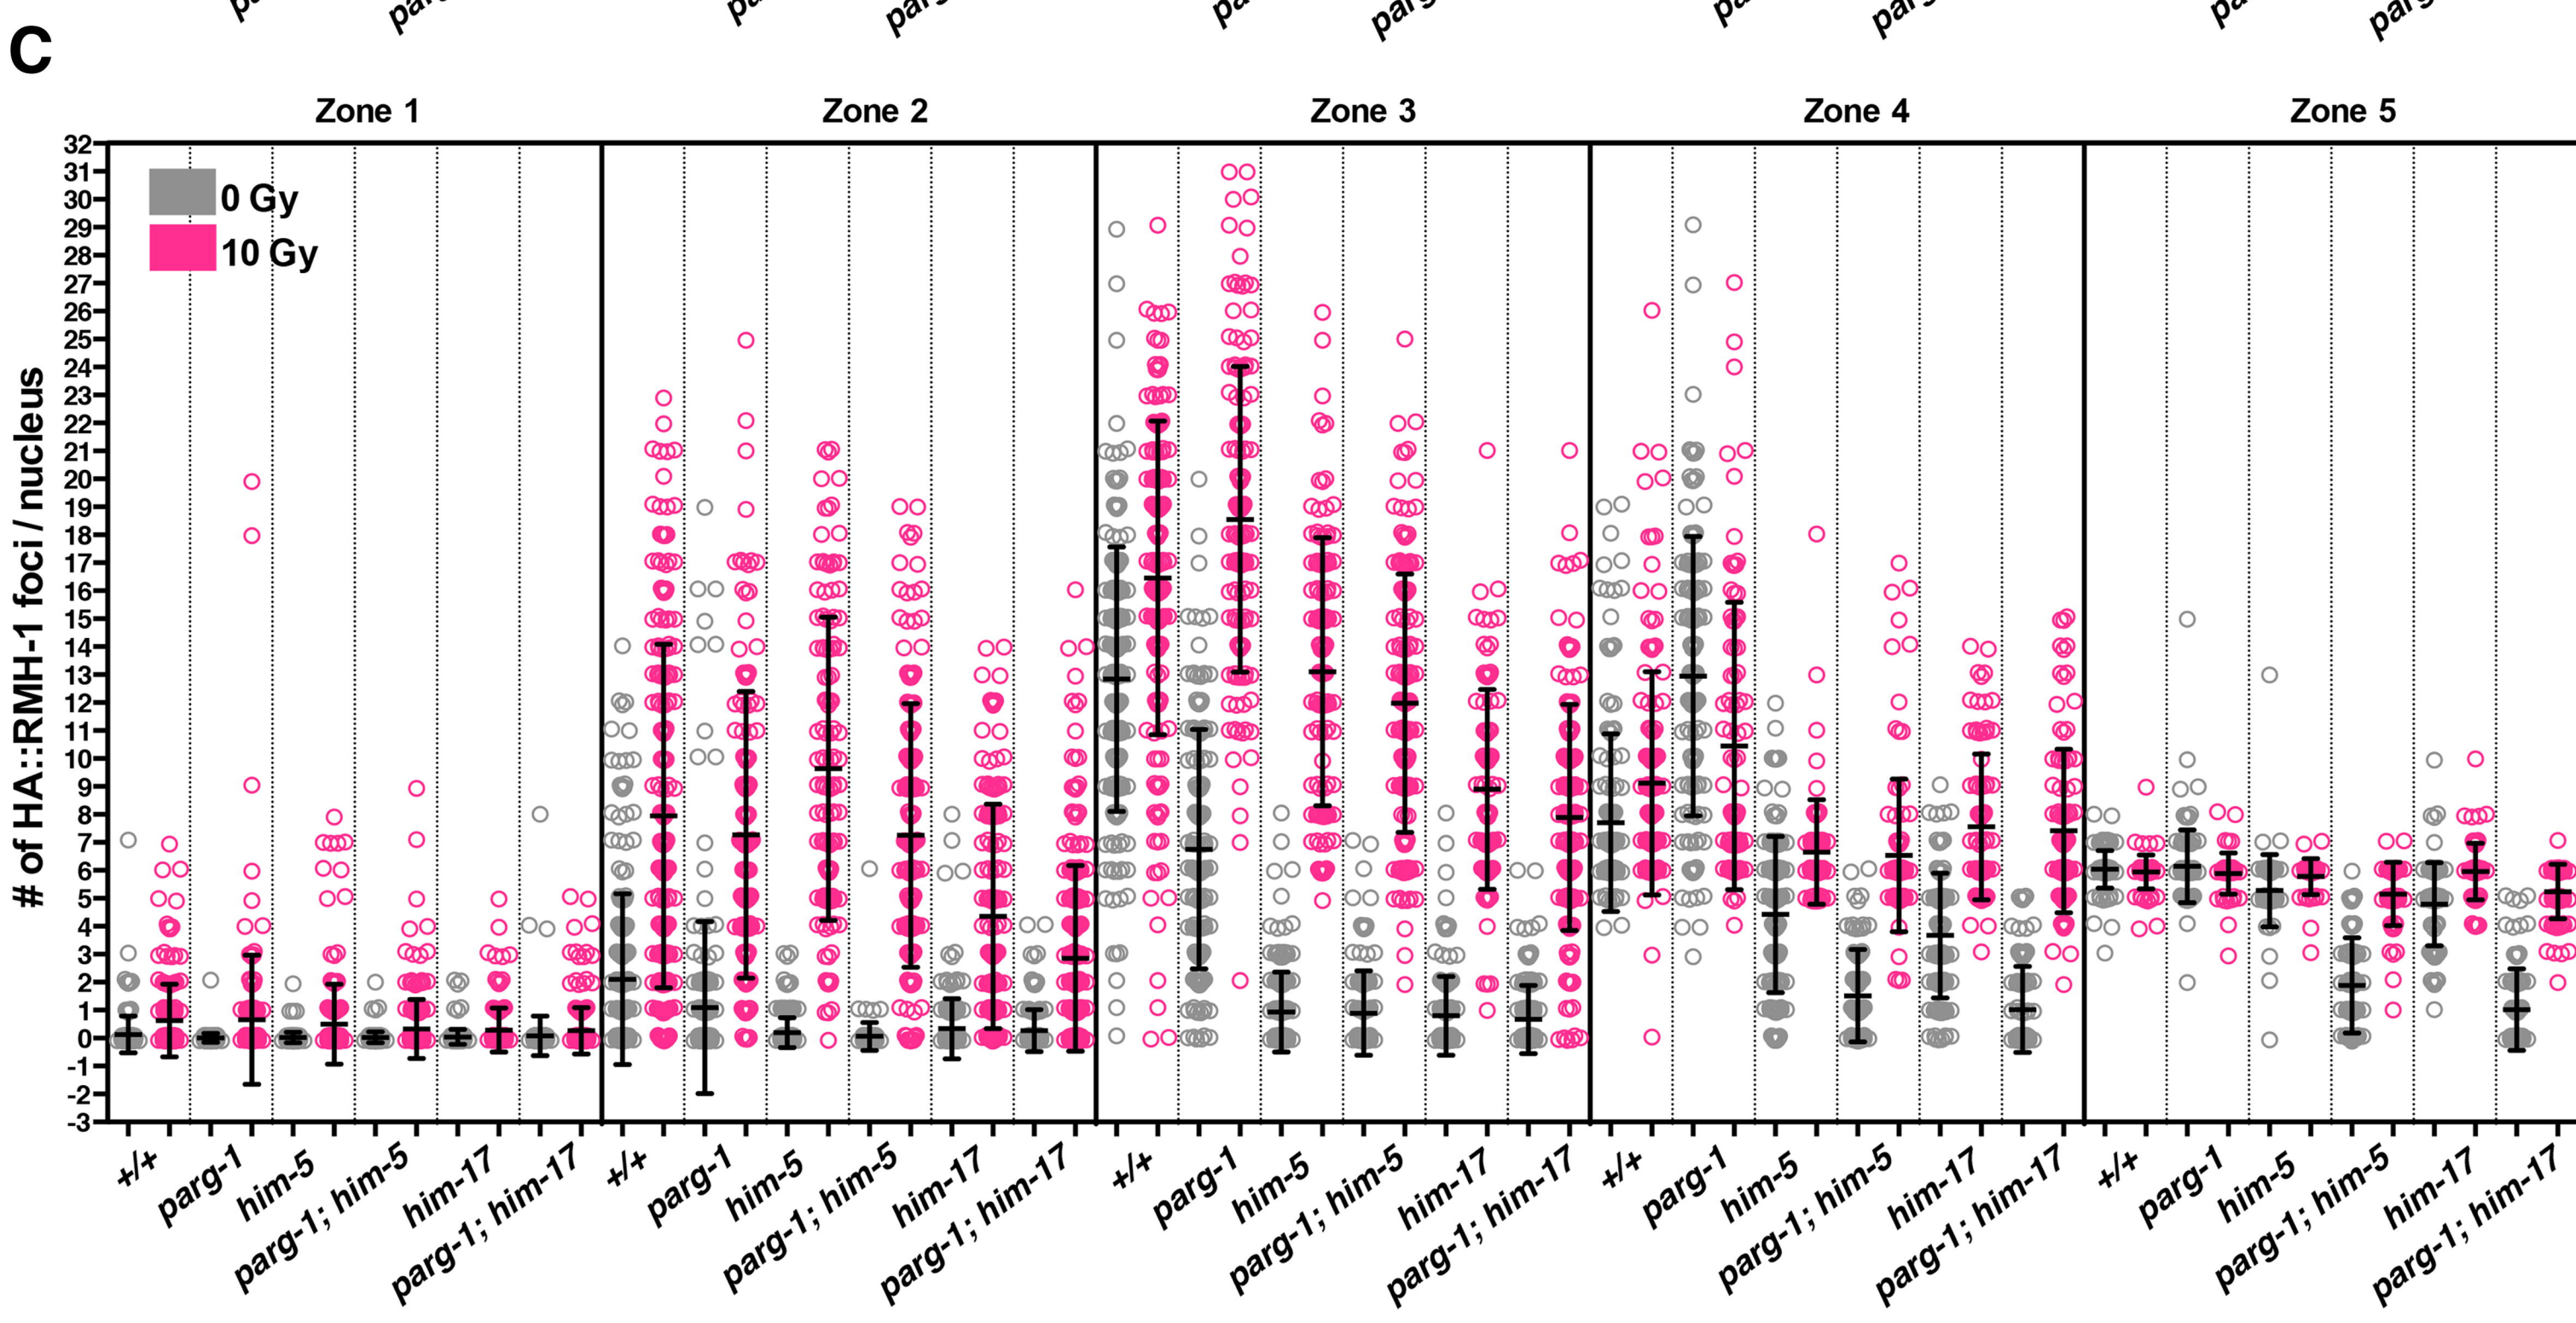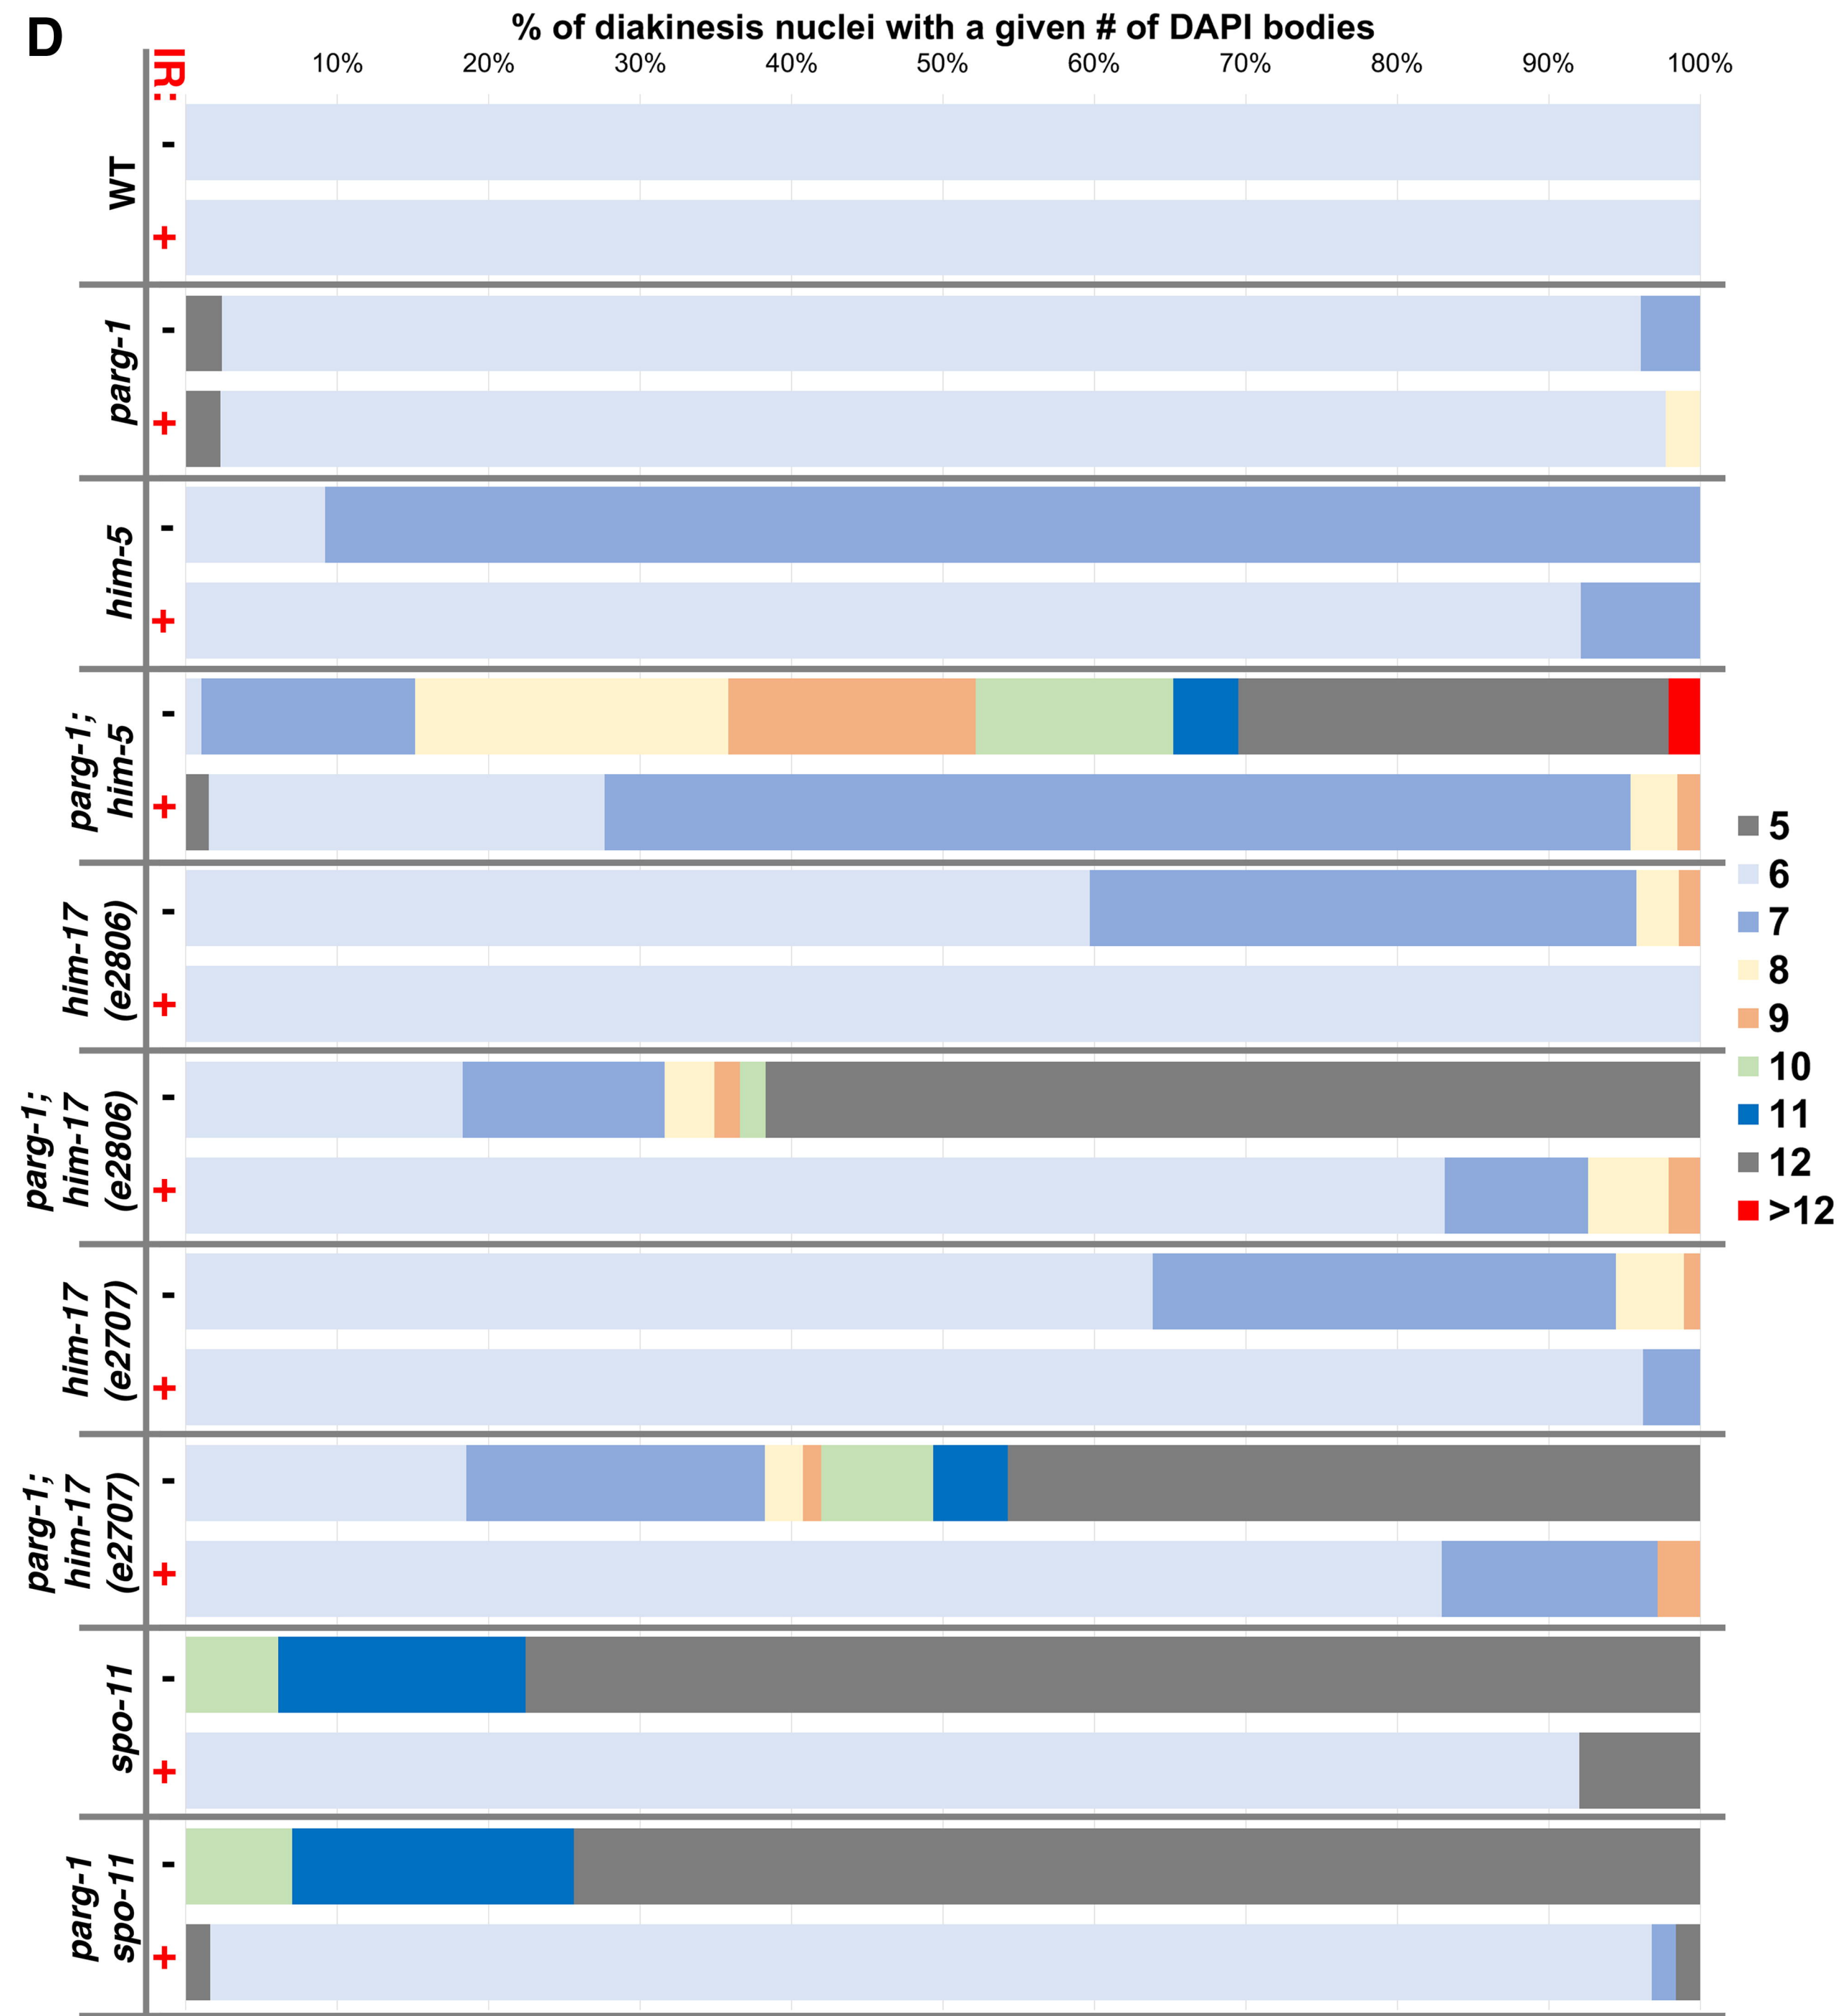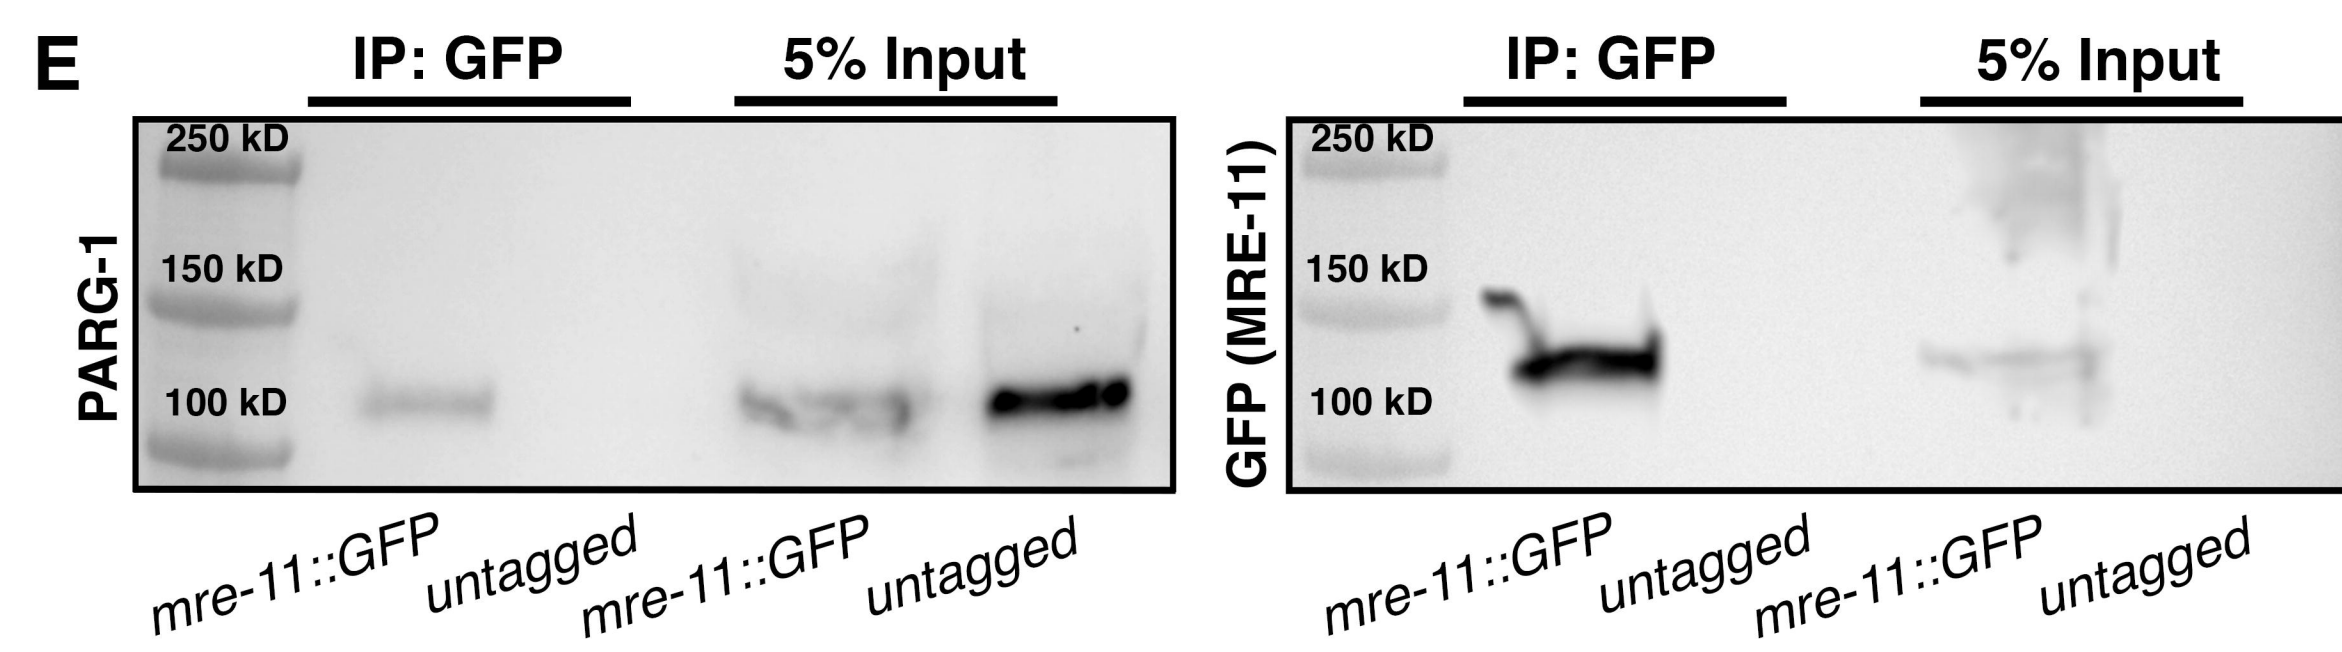



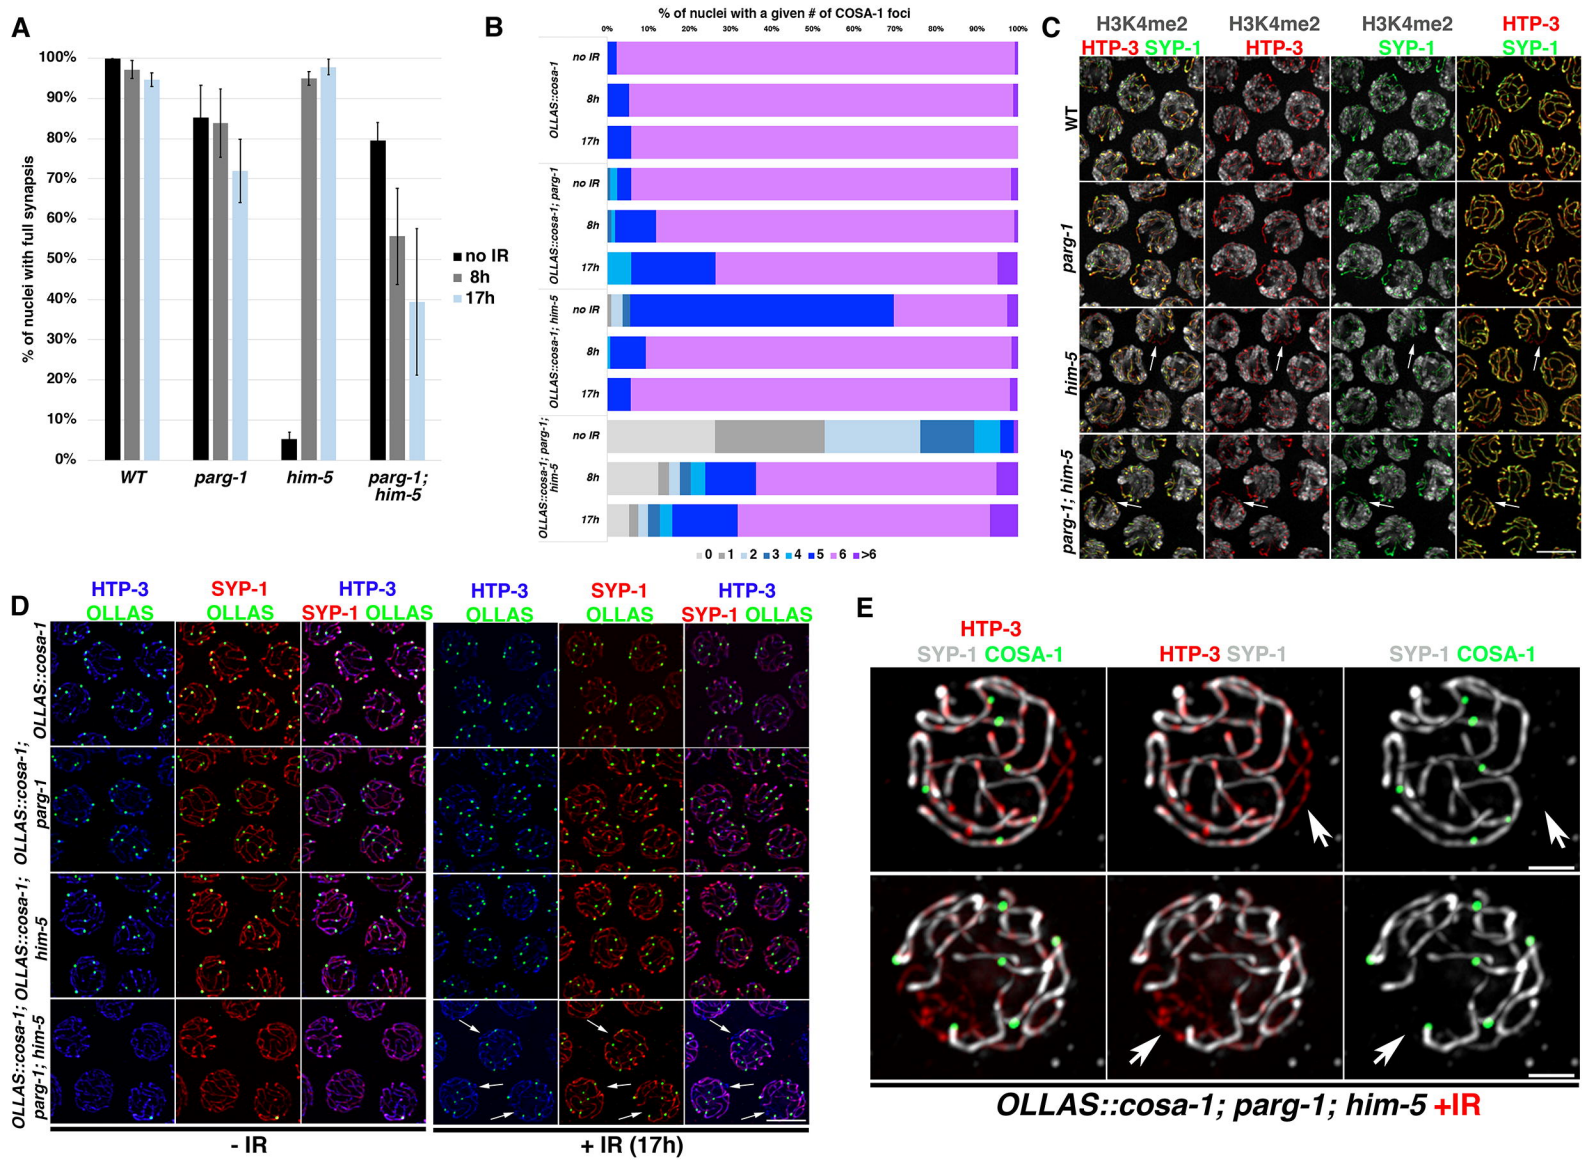

**A****Total Genetic Interval 45 cM**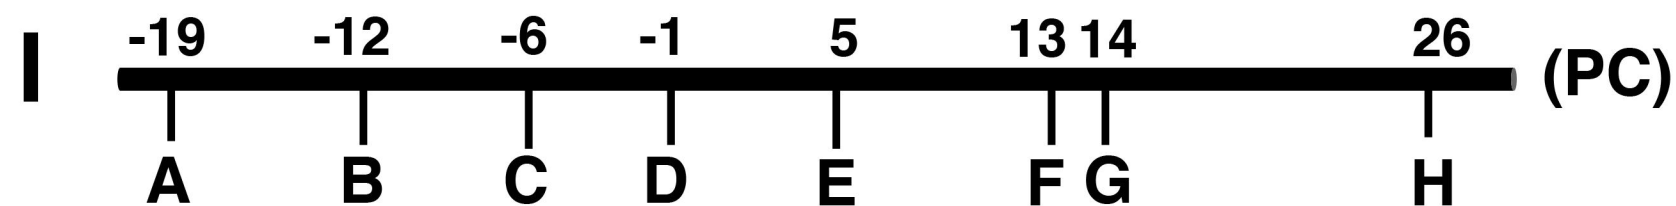**Recombination frequency along Chromosome I**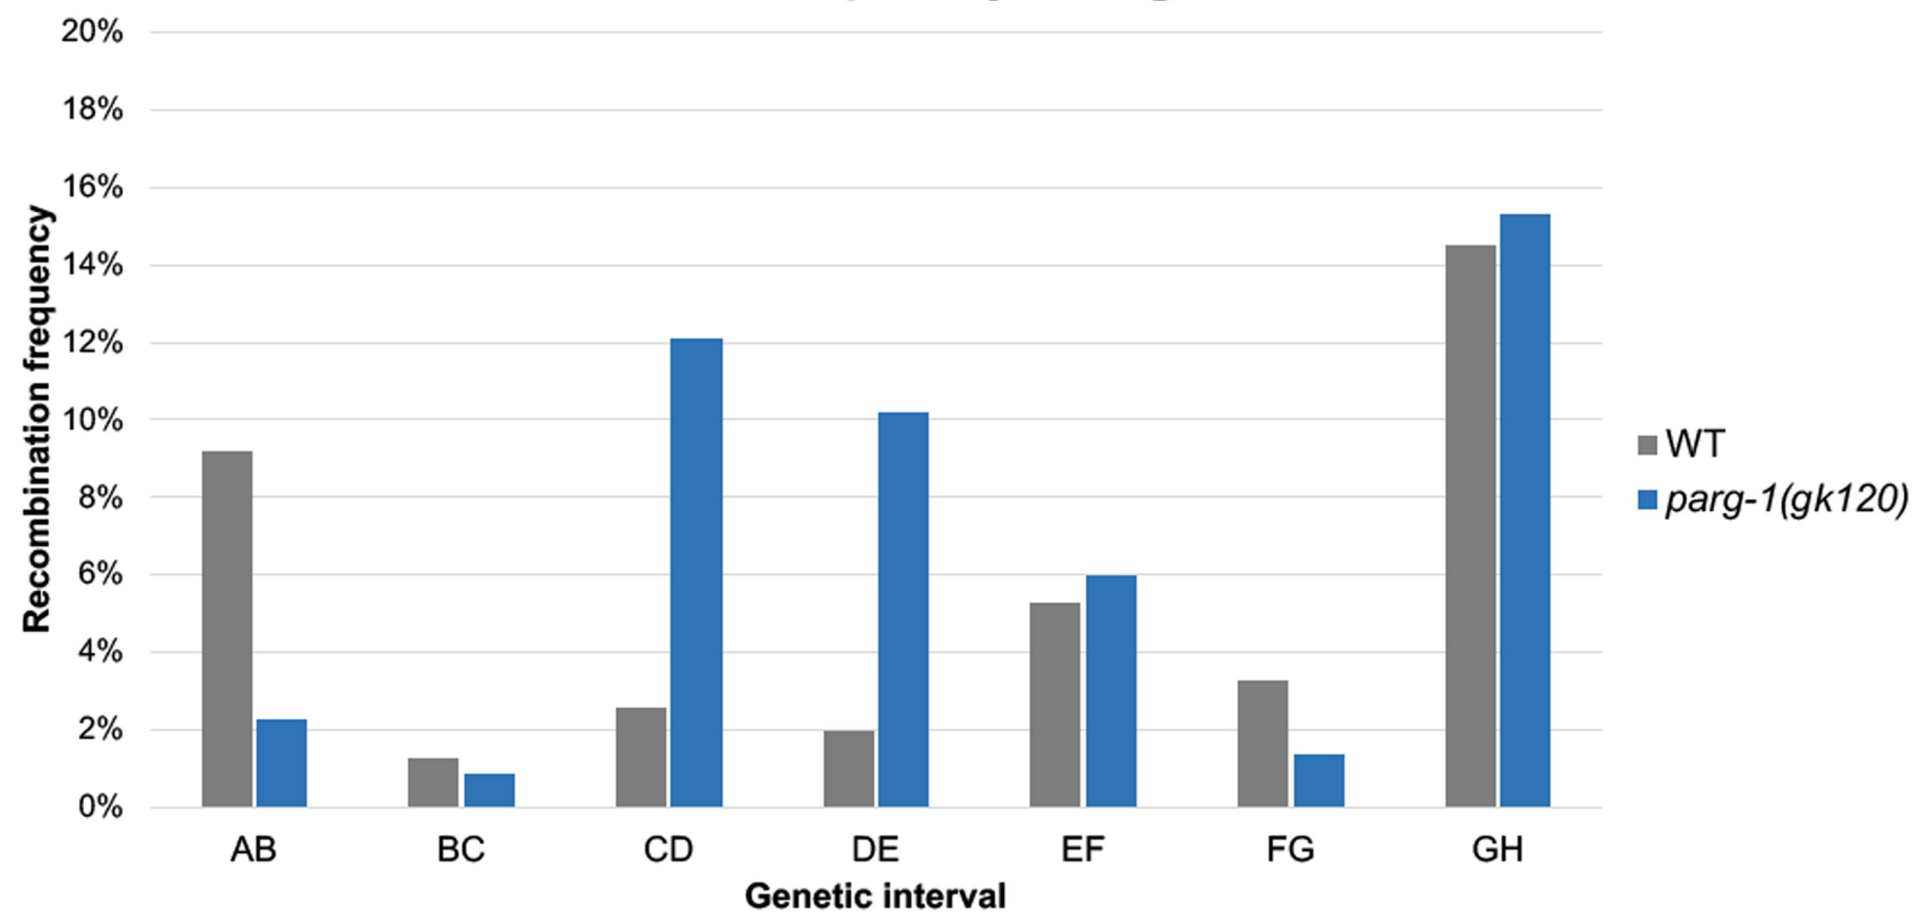

| Ch. I                            | SCO               | DCO             | TCO             |
|----------------------------------|-------------------|-----------------|-----------------|
| WT<br>(n= 152)                   | 58/58<br>(100%)*  | 0<br>(0%)*      | 0<br>(0%)*      |
| <i>parg-1(gk120)</i><br>(n= 215) | 88/98<br>(89.8%)* | 6/98<br>(6.1%)* | 4/98<br>(4.1%)* |

\* = calculated over the total number of recombinant animals

**B****Total Genetic Interval 35 cM**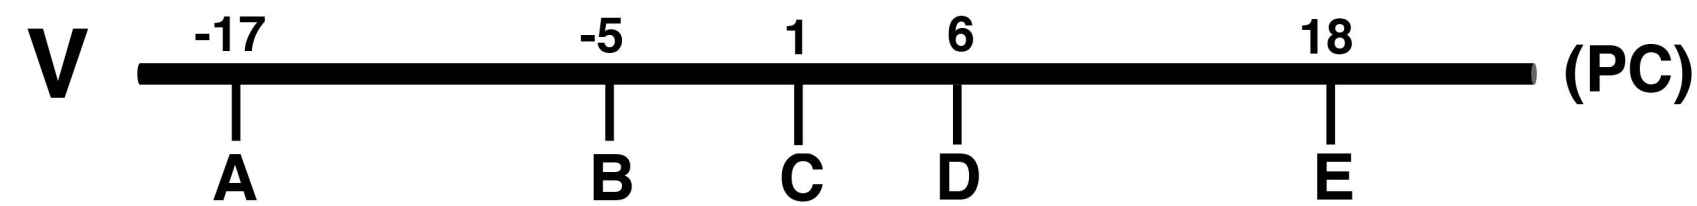**Recombination frequency along Chromosome V**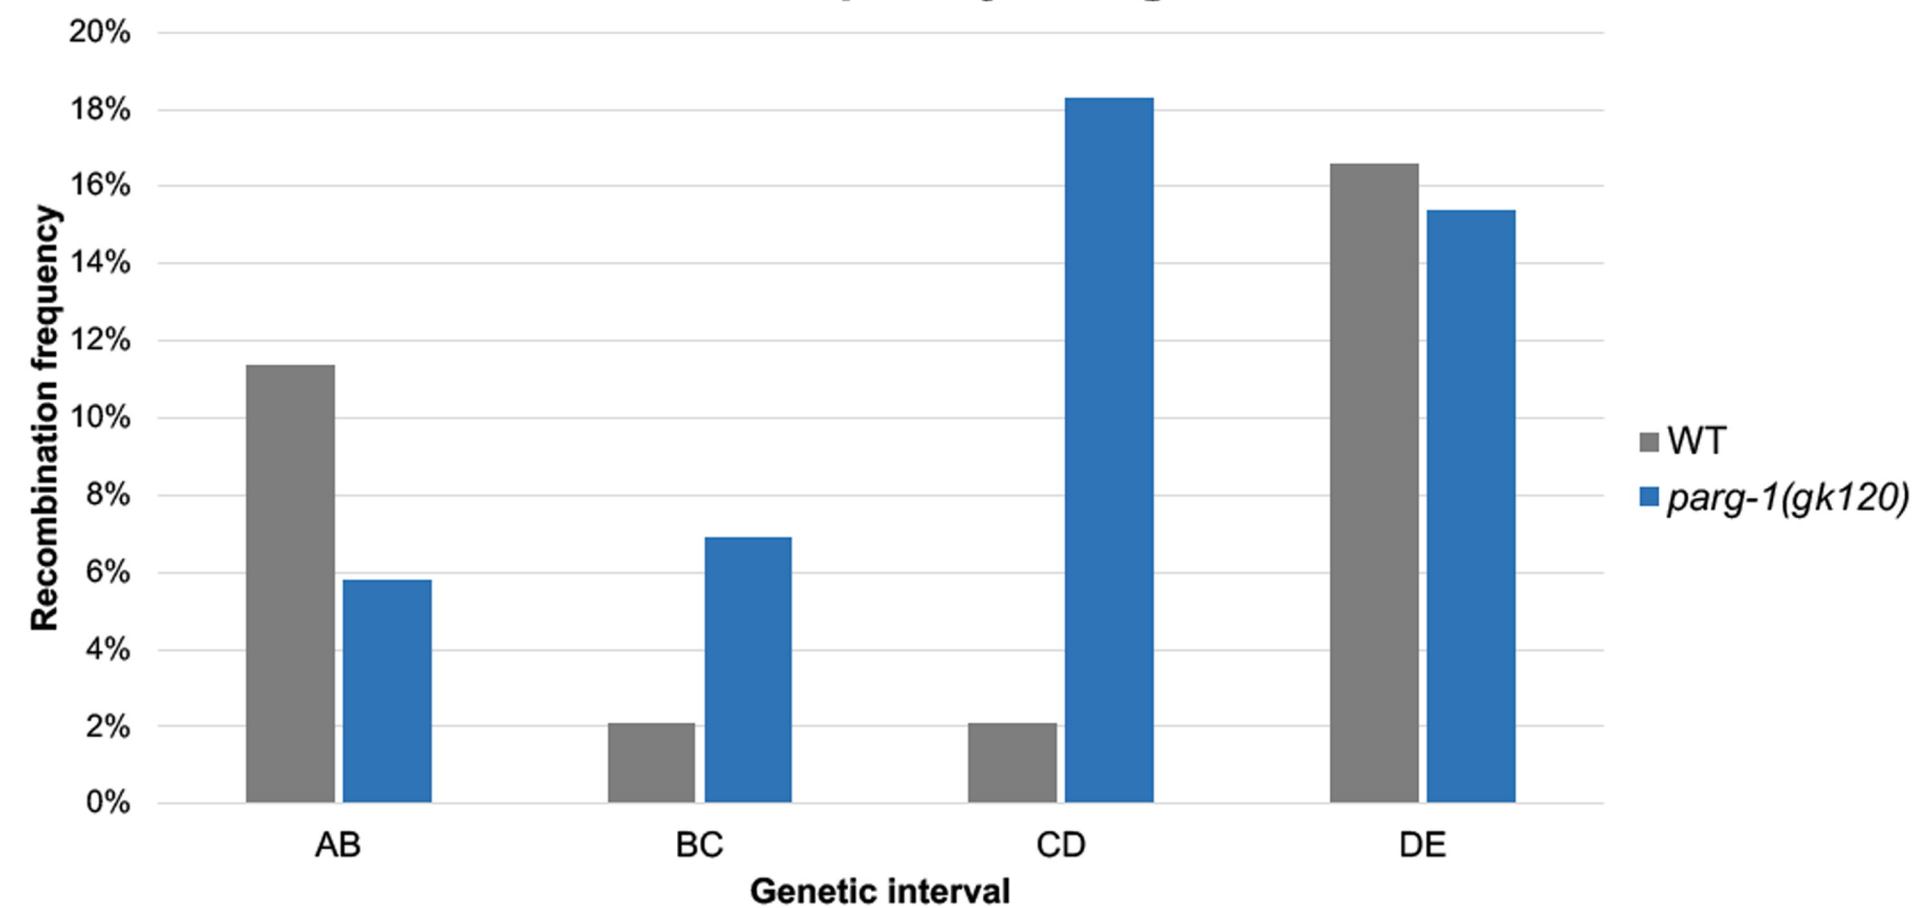

| Ch. V                            | SCO                 | DCO               | TCO              |
|----------------------------------|---------------------|-------------------|------------------|
| WT<br>(n= 193)                   | 62/62<br>(100%)*    | 0<br>(0%)*        | 0<br>(0%)*       |
| <i>parg-1(gk120)</i><br>(n= 377) | 143/159<br>(89.9%)* | 15/159<br>(9.4%)* | 1/159<br>(0.6%)* |

\* = calculated over the total number of recombinant animals

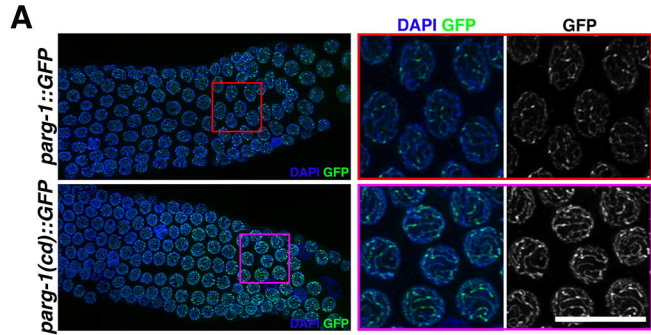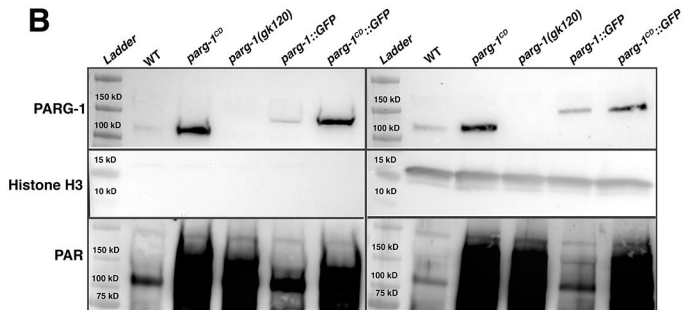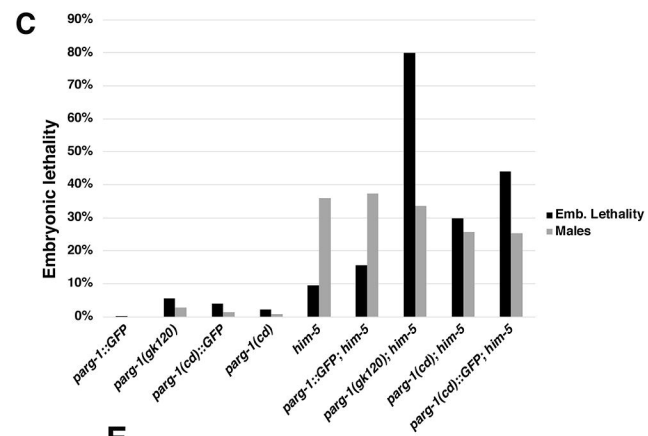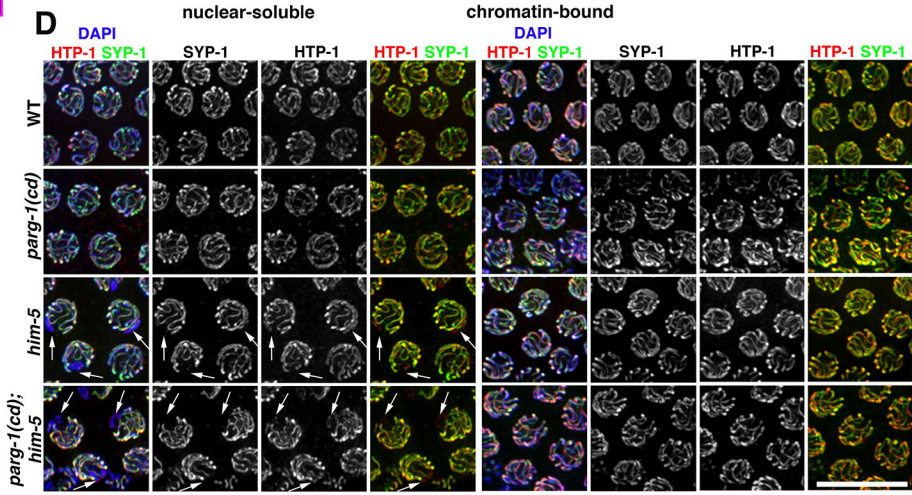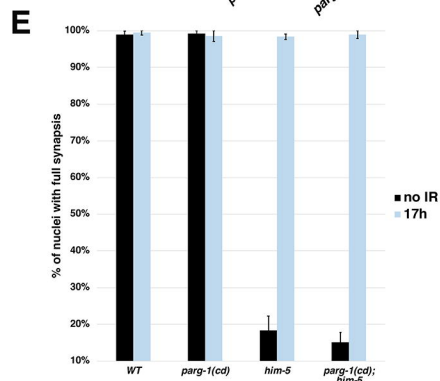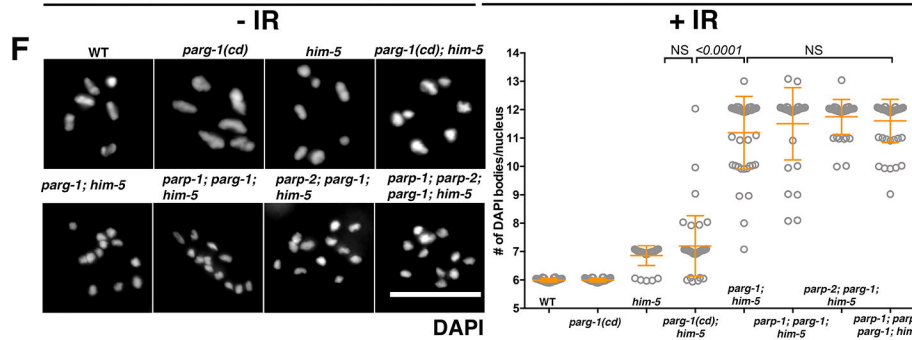

Source: https://www.biorxiv.org/content/10.1101/2020.03.12.988840v1.full.pdf
